# Supplementary material for: Palladium catalyzed domino reaction of 1,4-disubstituted 1,2,3-triazoles via double C–H functionalization: one-pot synthesis of triazolo[1,5-f]phenanthridines
Source: Royal Society of Chemistry journal article supplement (doi:10.1039/c6ra06755g), 2016-01-01
Supplement: c6ra06755g1.pdf [file c6ra06755g1.pdf]

Supplementary Material (ESI) for Chemical Communication

This journal is (c) The Royal Society of Chemistry 2009

**Palladium Catalyzed Domino Reaction of 1,4-Disubstituted 1,2,3-Trizoles  
via Double C-H Activation: One-pot Synthesis of  
Triazolo [1,5-f] Phenanthridines**

Avnish Kumar,<sup>a</sup> Sundar S. Shinde<sup>a</sup>, Dharmendra Kumar Tiwari,<sup>a</sup> Balasubramanyam Sridhar<sup>b</sup> and  
Pravin R. Likhar\*<sup>a</sup>

**Table of contents**

|          |                                                                            |       |
|----------|----------------------------------------------------------------------------|-------|
| <b>1</b> | General Information                                                        | 2     |
| <b>2</b> | General Experimental Procedures                                            | 2-3   |
| <b>3</b> | Plausible mechanism for heterocondensation                                 | 3     |
| <b>4</b> | <sup>1</sup> H and <sup>13</sup> C Spectra of compounds ( <b>2a-2t</b> )   | 4-22  |
| <b>5</b> | <sup>1</sup> H and <sup>13</sup> C Spectra of compounds ( <b>4aa-4ae</b> ) | 22-38 |
| <b>6</b> | X-ray Single Crystal Structure of <b>2a</b>                                | 39-40 |
| <b>7</b> | References                                                                 | 40    |

## Experimental Section

### General information:

All reagents were purchased from commercial suppliers and used without further purification. All experiments were carried out under nitrogen atmosphere. All the solvents used for the reaction were distilled before use. The product purification by column chromatography was accomplished using silica gel 100-200 mesh. Analytical TLC was performed with Merck silica gel 60 F254 plates, and the products were visualized by UV detection. The  $^1\text{H}$  NMR and  $^{13}\text{C}$  NMR spectra were recorded on a Bruker-Avance (300 MHz); Inova (400 MHz) and Avance (500 MHz) spectrophotometer using  $\text{CDCl}_3$  and TMS as the internal standard. Chemical shifts ( $\delta$ ) are reported in ppm using TMS as an internal standard, and spin-spin coupling constants ( $J$ ) are given in Hz. Multiplicities in the  $^1\text{H}$  NMR spectra are described as: s = singlet, d = doublet, t = triplet, q = quartet, qt = quintet, m = multiplet, bs = broad singlet; coupling constants are reported in Hz. Low (MS) and high (HRMS) resolution mass spectra were recorded on a Waters 2695 and Thermo Scientific Exactive spectrometer respectively and mass/charge ( $m/z$ ) ratios are reported as values in atomic mass units. All the melting point is uncorrected.

### General experimental procedure for the synthesis of 2-iodophenyl 4-alkyl/aryl-1H 1,2,3-triazole (1a-1y)<sup>1</sup>:

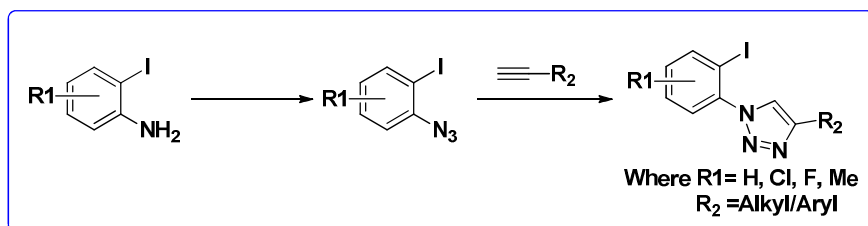

To a stirred solution of 2-iodoaniline (3.0 mmol) in 4N HCl (10 mL) was added  $\text{NaNO}_2$  (0.82 gm, 12 mmol) slowly in portions over a period of 15 mins at  $0^\circ\text{C}$ . The reaction mixture was allowed to stir at same temperature for another 30 min. To the above reaction mixture sodium azide (0.59 gm, 9.0 mmol) was slowly added in portions and the mixture allowed to come to the room temperature and stirred for 4-12 hrs (monitored by TLC using hexane: ethyl acetate (8:2) solvent). The reaction mixture was successively diluted with water. The aqueous layer was extracted with ethyl acetate (3 x 60 mL), and combined organic layers were washed with water, followed by brine, dried over  $\text{Na}_2\text{SO}_4$  and concentrated under reduced pressure to obtain crude azide derivatives which was carried forward for the

click reaction without any further purification. To a solution of crude azide (0.49 gm, 2.0 mmol) and terminal alkyl/aryl acetylene (2.0 mmol) in DMF (10 mL) was added CuI (10 mol%) and the mixture was heated at 100 °C for 8 hrs. The aqueous layer was extracted with ethyl acetate (3 x 40 mL), and combined organic layer was washed with water (3 x 50 mL), followed by brine, dried over Na<sub>2</sub>SO<sub>4</sub> and concentrated under reduced pressure to obtain crude triazole derivatives in quantitative yields.

**Plausible mechanism for hetero aryl cross coupling:** Based on the literature reports<sup>2</sup> a plausible mechanism for the cross coupling reaction between **1a** and **3a** in the presence norbornene can be rationalized (depicted in ESI-scheme-1). Initially, the aryl iodide (**3a**) oxidatively insert to Pd(0) to give Pd(II) (**A**) species and then norbornene inserts into **A** to give corbopalladacyclic intermediate (**B**) after removal of HI in the presence of base. The oxidative addition of substituted triazole **1a** to corbopalladacyclic intermediate (**B**) to give Pd(IV) intermediate (**C**). Aryl-aryl bond formation takes place *via* reductive elimination and removal of nonbornene to give (**D**) which led to the formation of desired heterocoupled product (**4aa**) *via* intramolecular C-H activation.

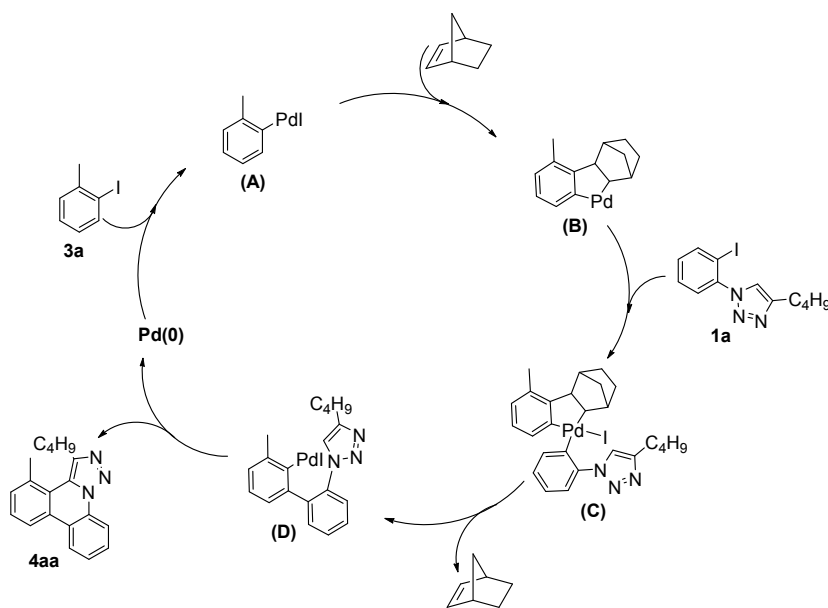

**ESI-scheme-1:** Plausible mechanism for heterocoupling

8.805  
8.803  
8.788  
8.786  
8.365  
8.363  
7.785  
7.635  
7.632  
7.619  
7.617  
7.521  
6.187  
6.180  
6.178  
6.163  
6.161

3.321  
3.306  
3.290  
2.922  
2.907  
2.891  
1.951  
1.935  
1.920  
1.797  
1.782  
1.767  
1.595  
1.580  
1.565  
1.550  
1.493  
1.479  
1.463  
1.449  
1.054  
1.039  
1.024  
1.007  
0.993

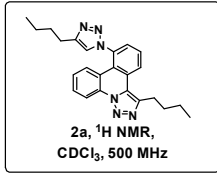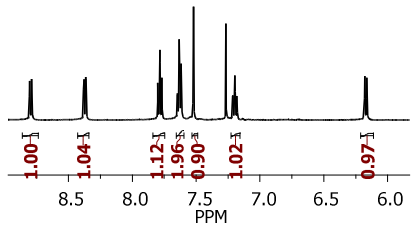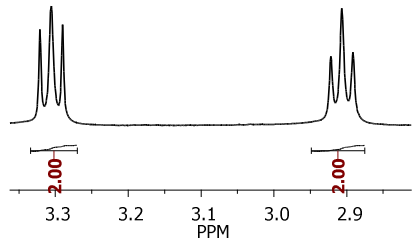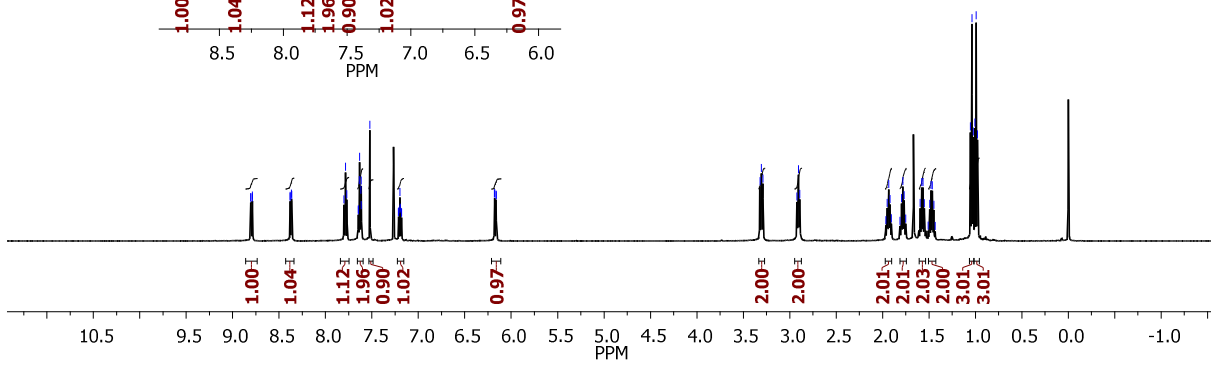

150.137  
143.028  
134.684  
132.042  
130.408  
129.156  
128.615  
127.152  
126.169  
125.897  
125.699  
123.878  
123.092  
119.311  
117.192

31.654  
30.499  
27.526  
25.332  
22.652  
22.221  
13.950  
13.856

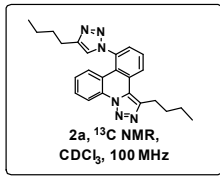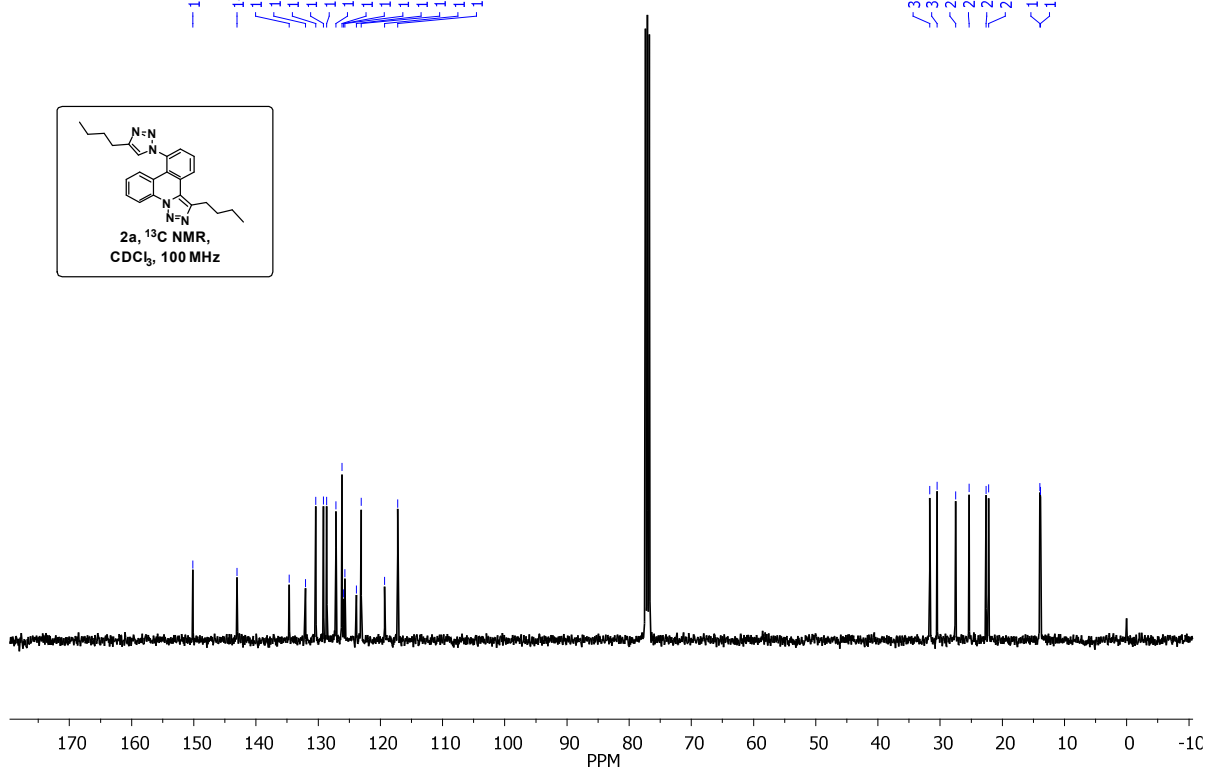

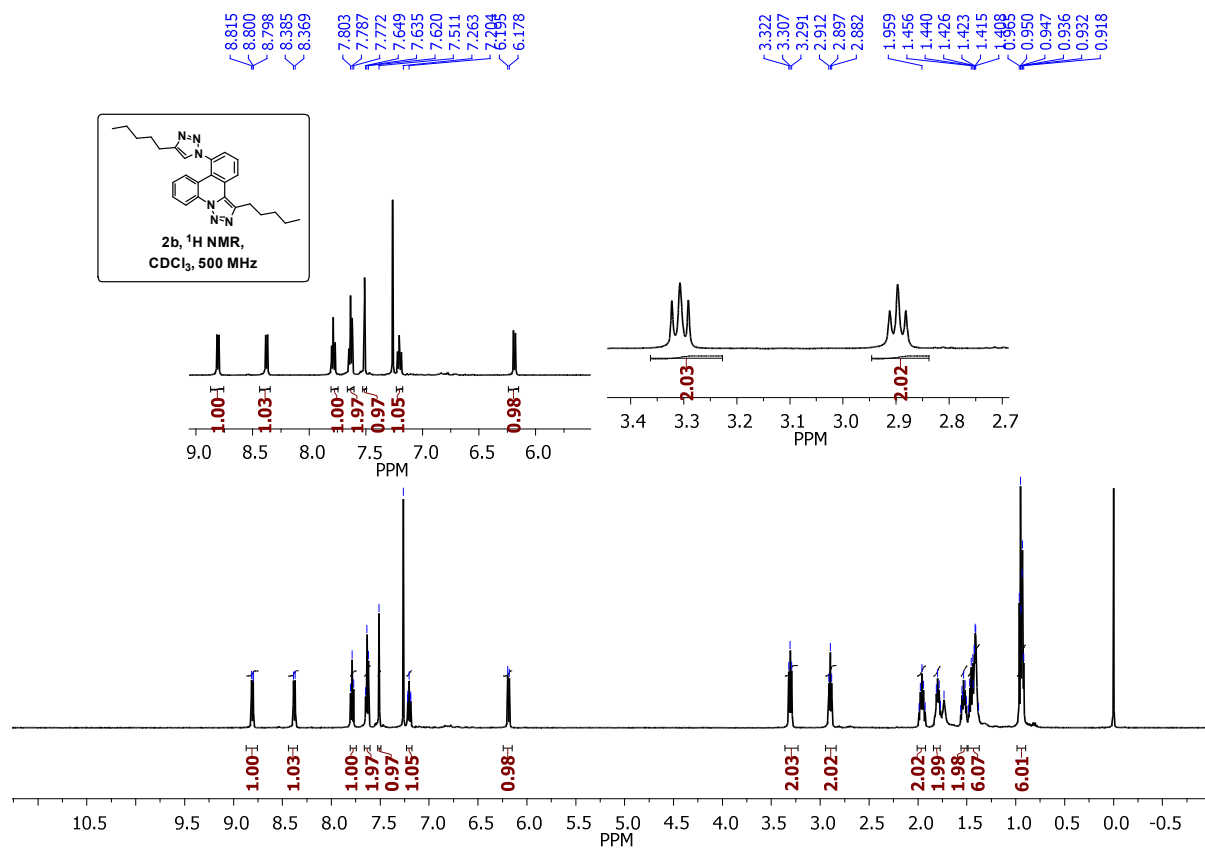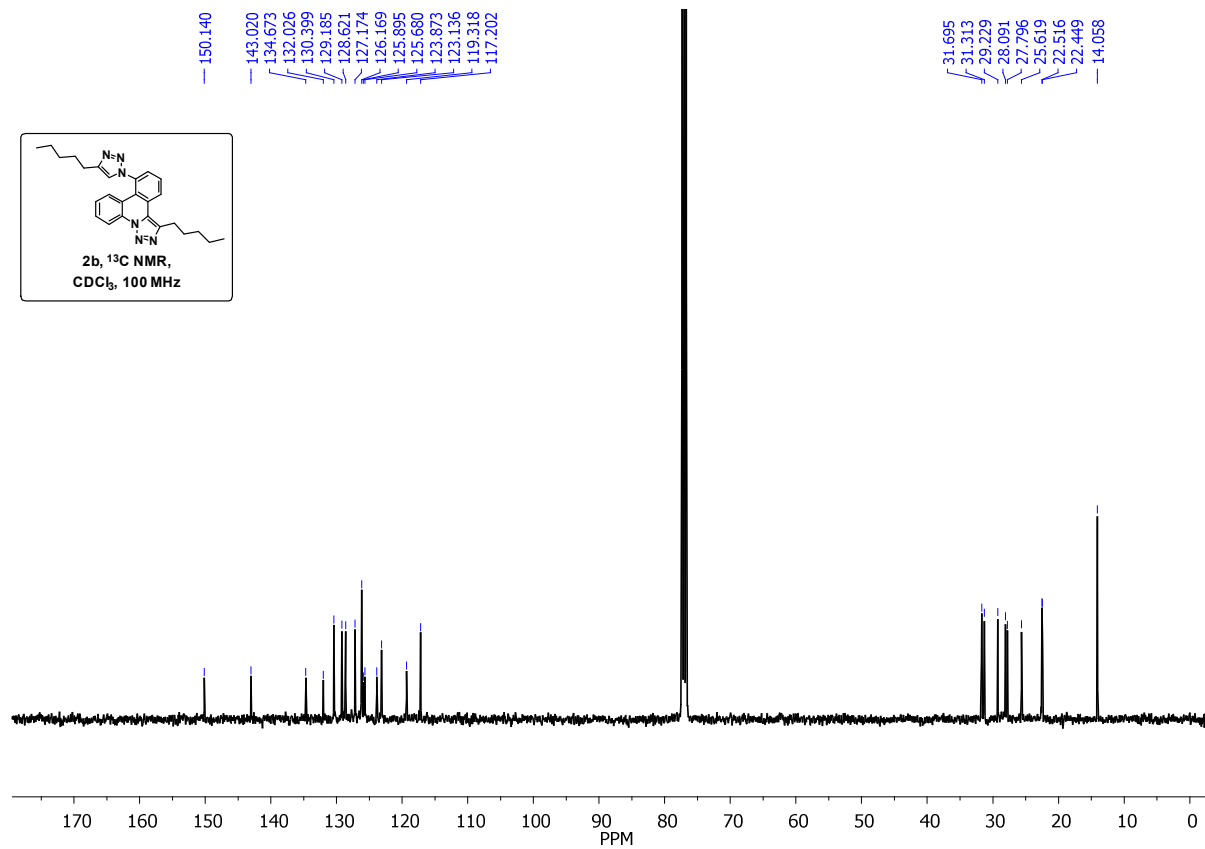

8.797  
8.795  
8.780  
8.370  
8.369  
8.354  
8.352  
7.795  
7.780  
7.764  
7.641  
7.639  
7.628  
7.626  
7.613  
7.611  
7.523  
7.211  
7.209  
7.197  
7.194  
7.191  
7.180  
7.177  
3.306  
3.291  
3.275  
2.913  
2.898  
2.883  
1.958  
1.942  
1.927  
1.805  
1.790  
1.775  
1.760  
1.562  
1.547  
1.531  
1.516  
1.456  
1.442  
1.437  
1.434  
1.423  
1.416  
1.408  
1.405  
1.400  
1.391  
1.386  
1.380  
1.378  
1.366  
1.358  
1.351  
1.344  
1.337  
0.931  
0.922  
0.917  
0.908  
0.903  
0.894

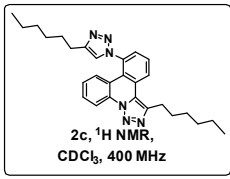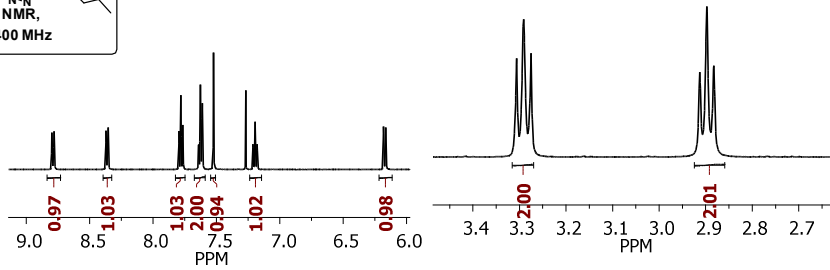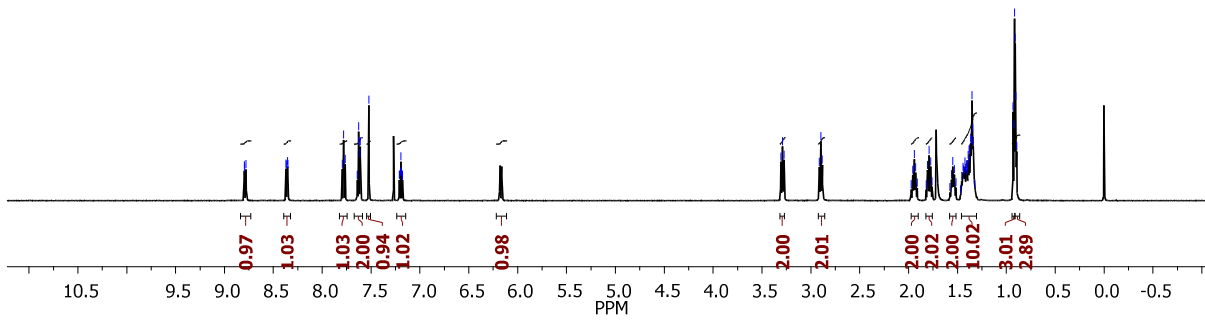

150.146  
134.681  
132.009  
130.356  
129.133  
128.585  
127.127  
126.157  
125.848  
125.661  
123.845  
123.085  
119.299  
117.149

31.656  
31.616  
29.525  
29.220  
28.843  
28.344  
27.828  
25.660  
22.633  
14.106

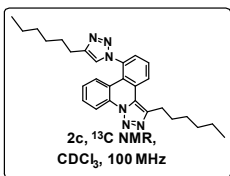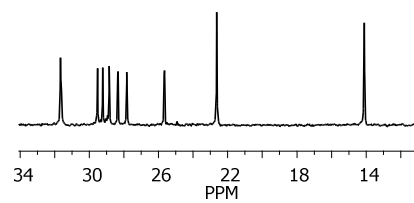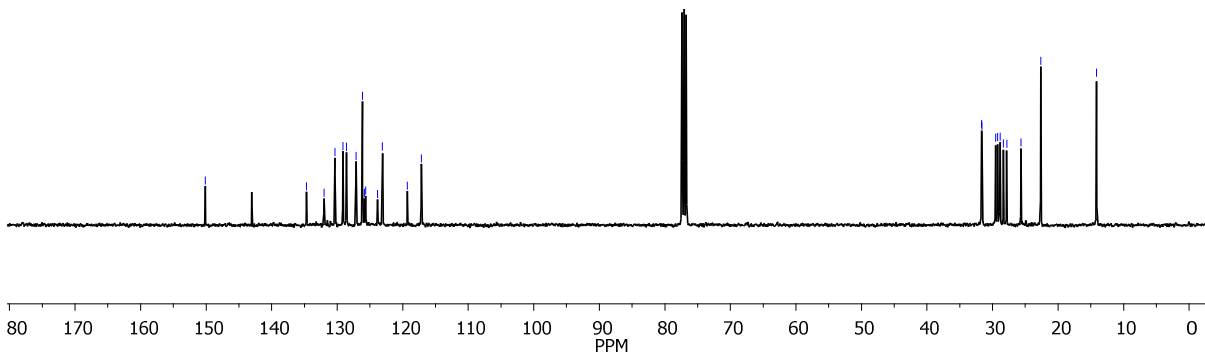

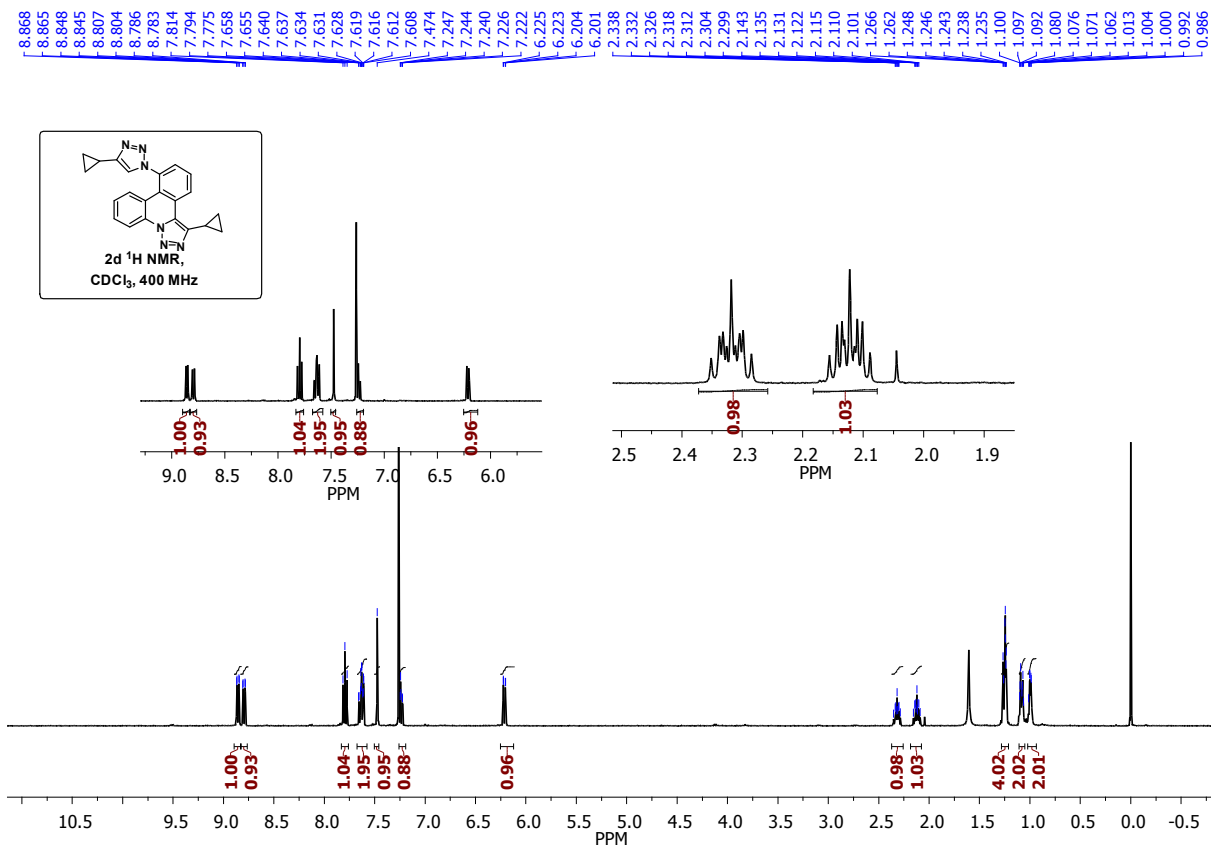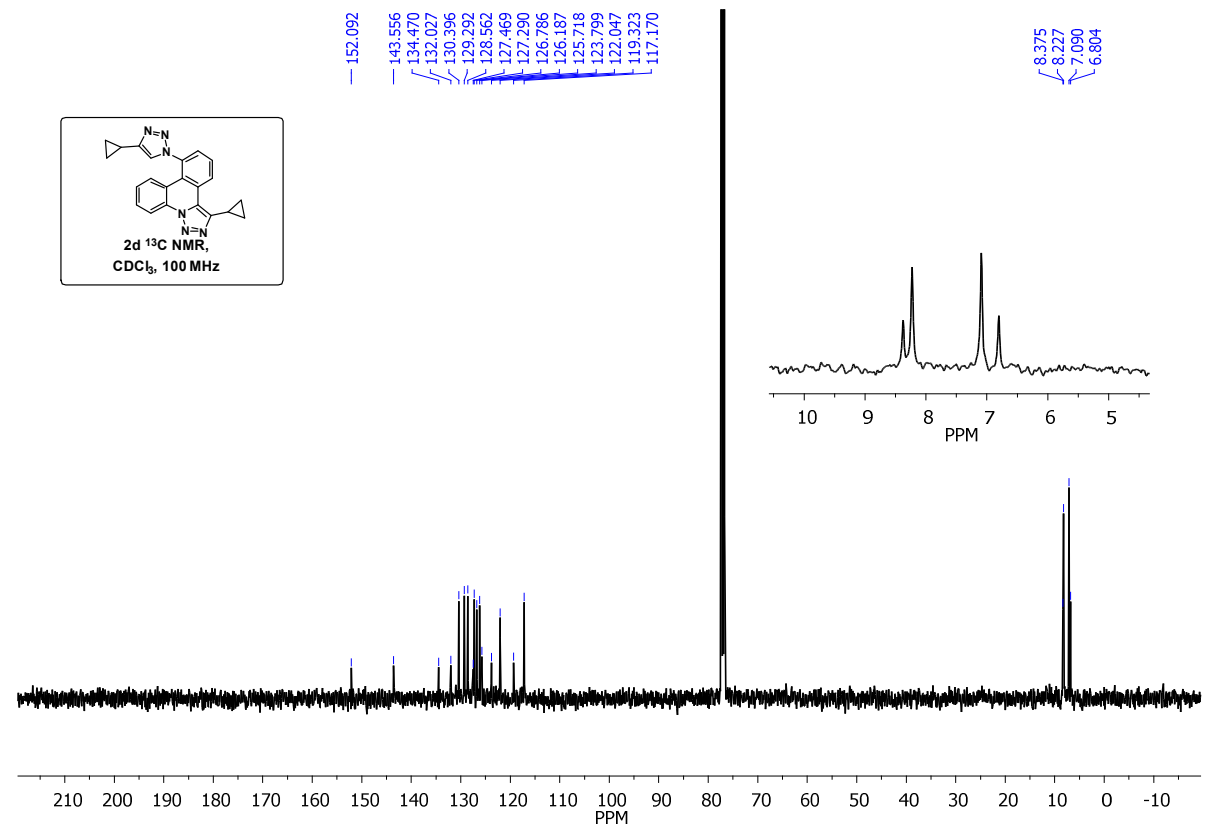

8.805  
8.788  
8.494  
8.478  
7.792  
7.776  
7.760  
7.646  
7.631  
7.619  
7.605  
7.480  
7.202  
7.186  
7.171  
6.138  
6.121  
3.818  
3.803  
3.787  
3.772  
3.756  
3.388  
3.373  
3.358  
3.343  
2.289  
2.277  
2.267  
2.253  
2.241  
2.233  
2.228  
2.219  
2.213  
2.203  
2.192  
2.187  
2.022  
2.006  
1.995  
1.990  
1.976  
1.964  
1.953  
1.856  
1.848  
1.839  
1.835  
1.831  
1.822  
1.815  
1.810  
1.795  
1.790  
1.771  
1.762  
1.753  
1.745  
1.736  
1.644  
1.637  
1.633  
1.627

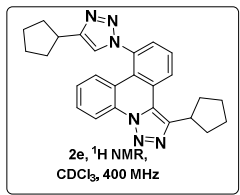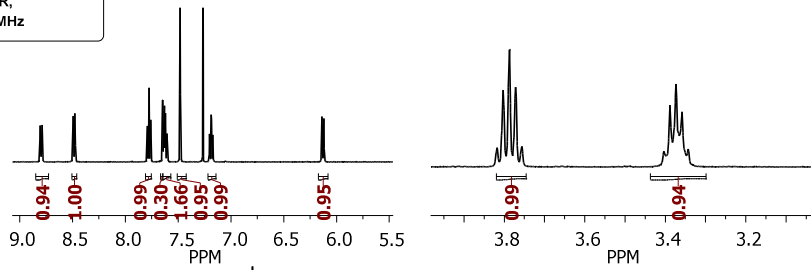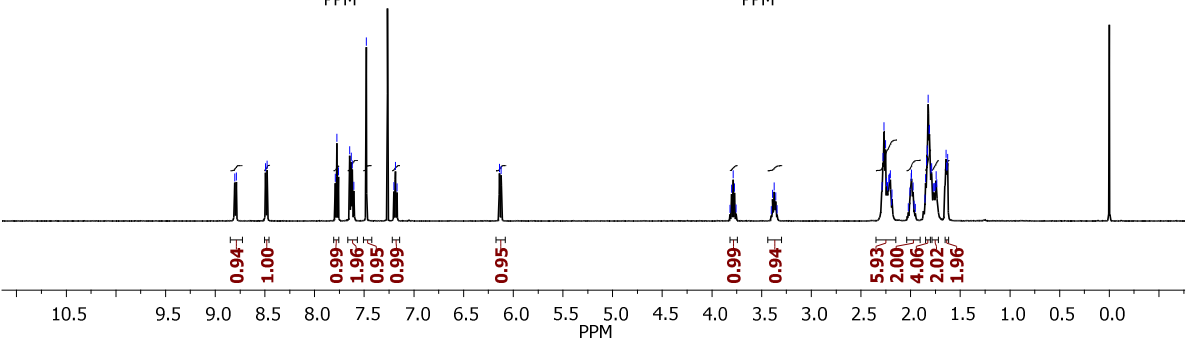

154.599  
146.500  
134.678  
132.081  
130.397  
129.010  
128.544  
127.070  
126.382  
126.123  
125.818  
125.636  
123.941  
122.217  
119.229  
117.175  
38.076  
36.804  
33.445  
32.156  
25.513  
25.176

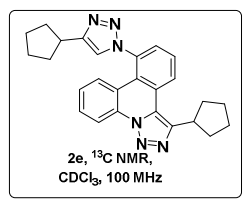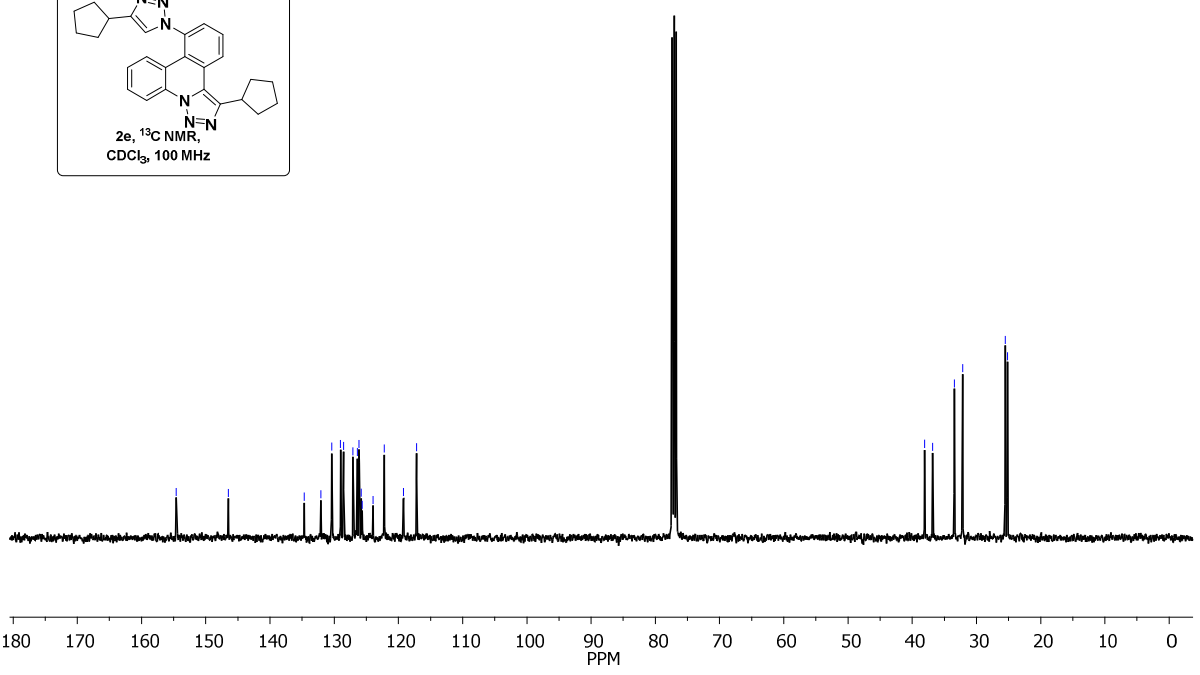



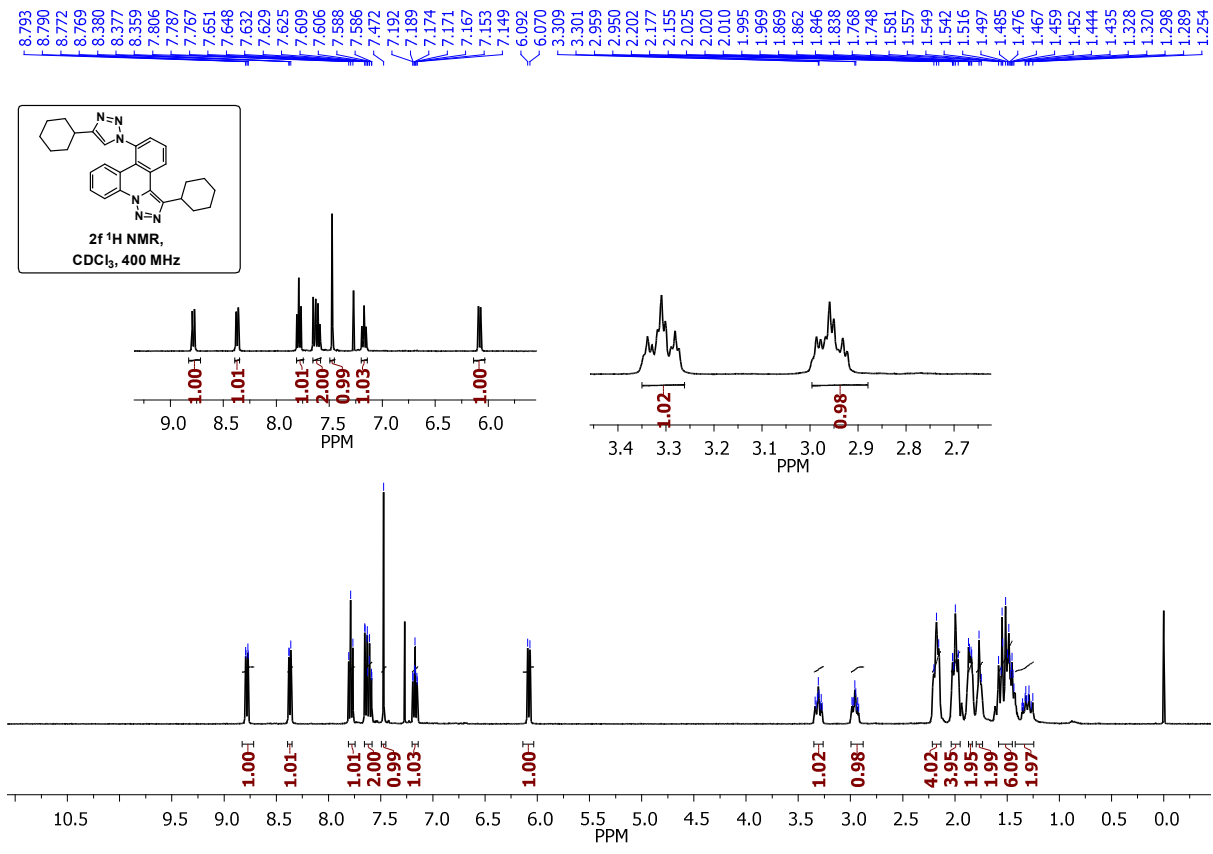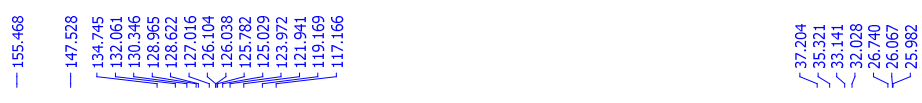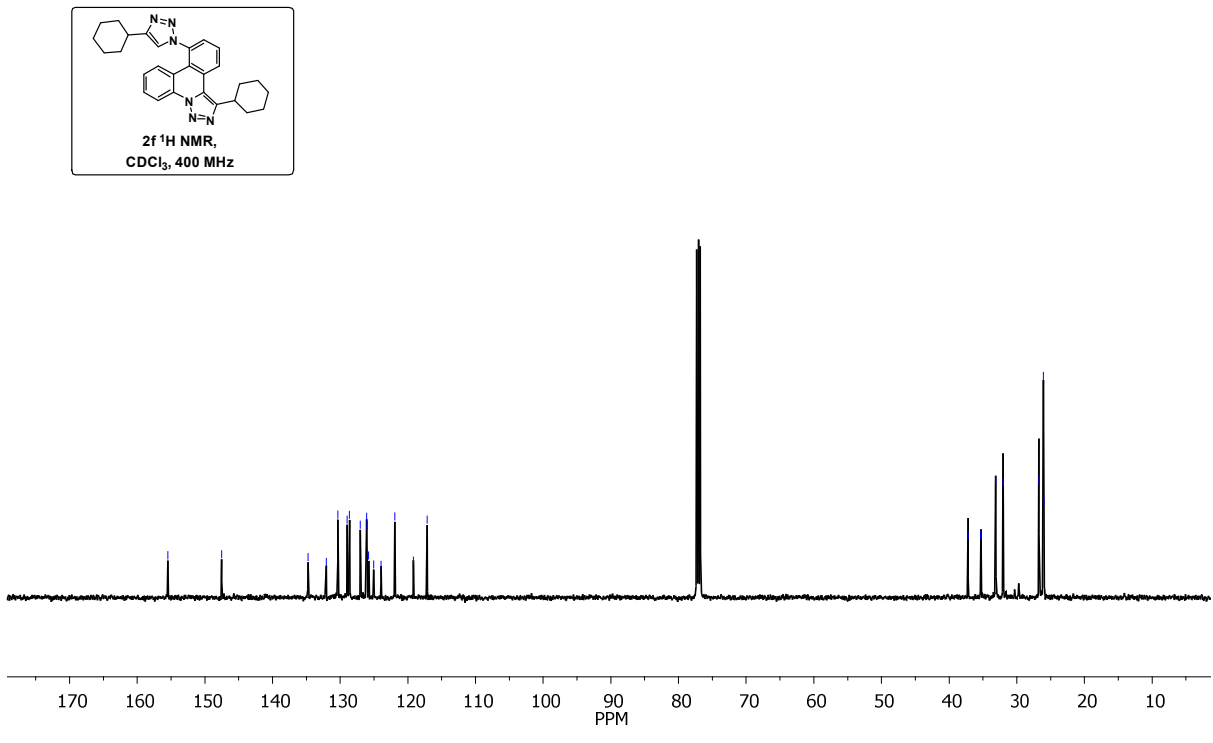

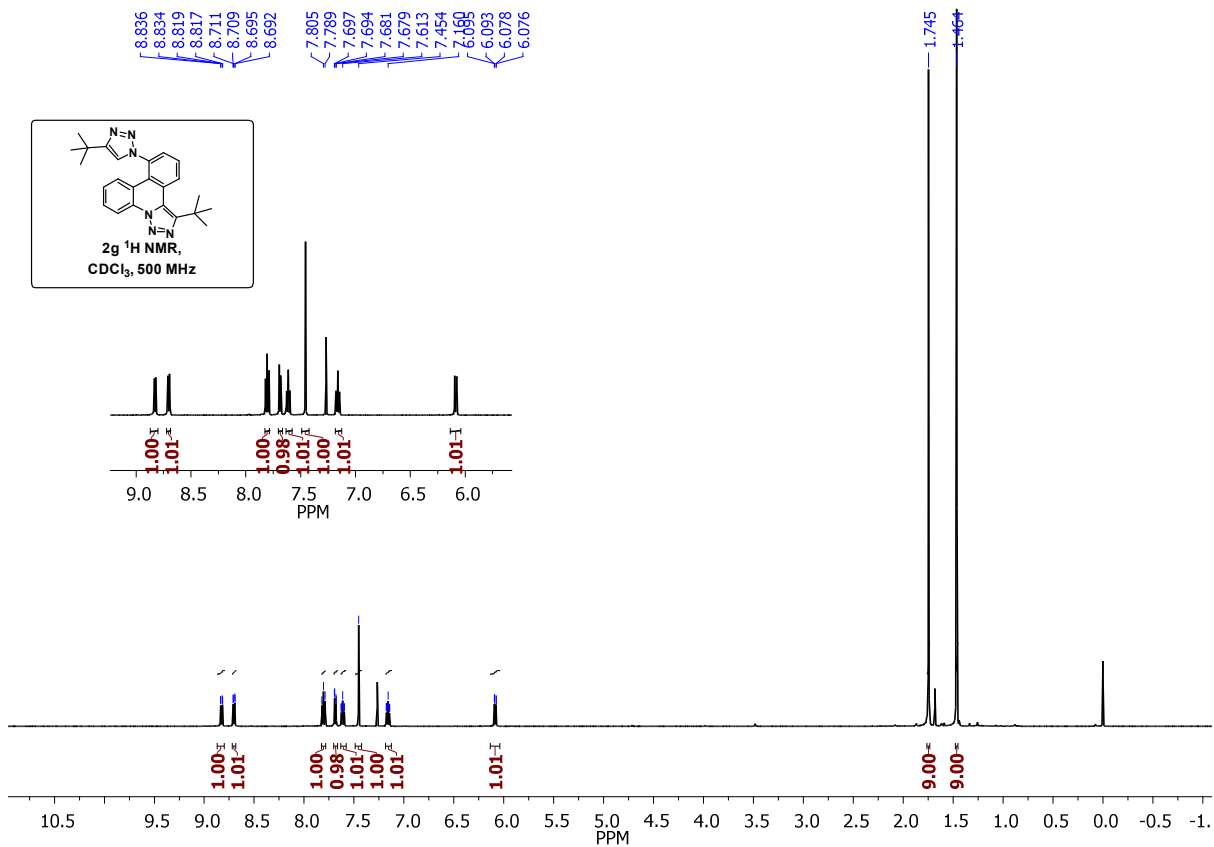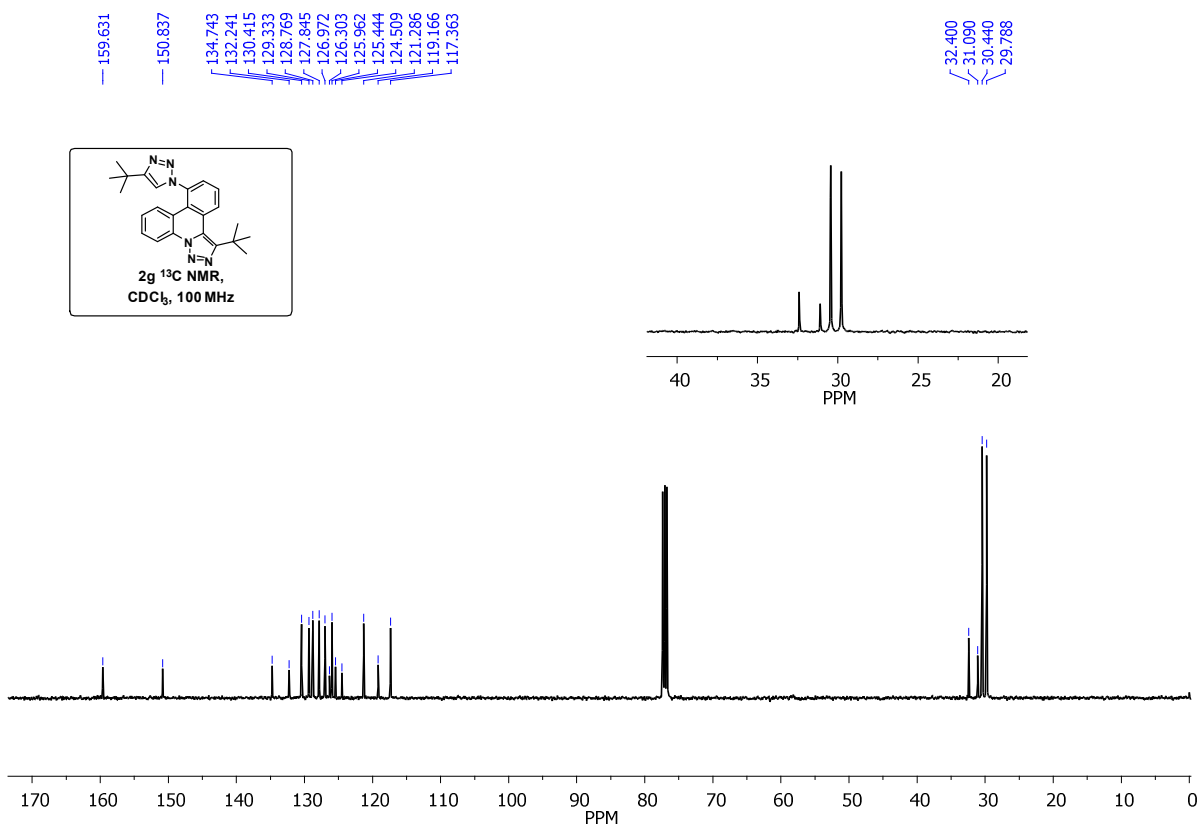

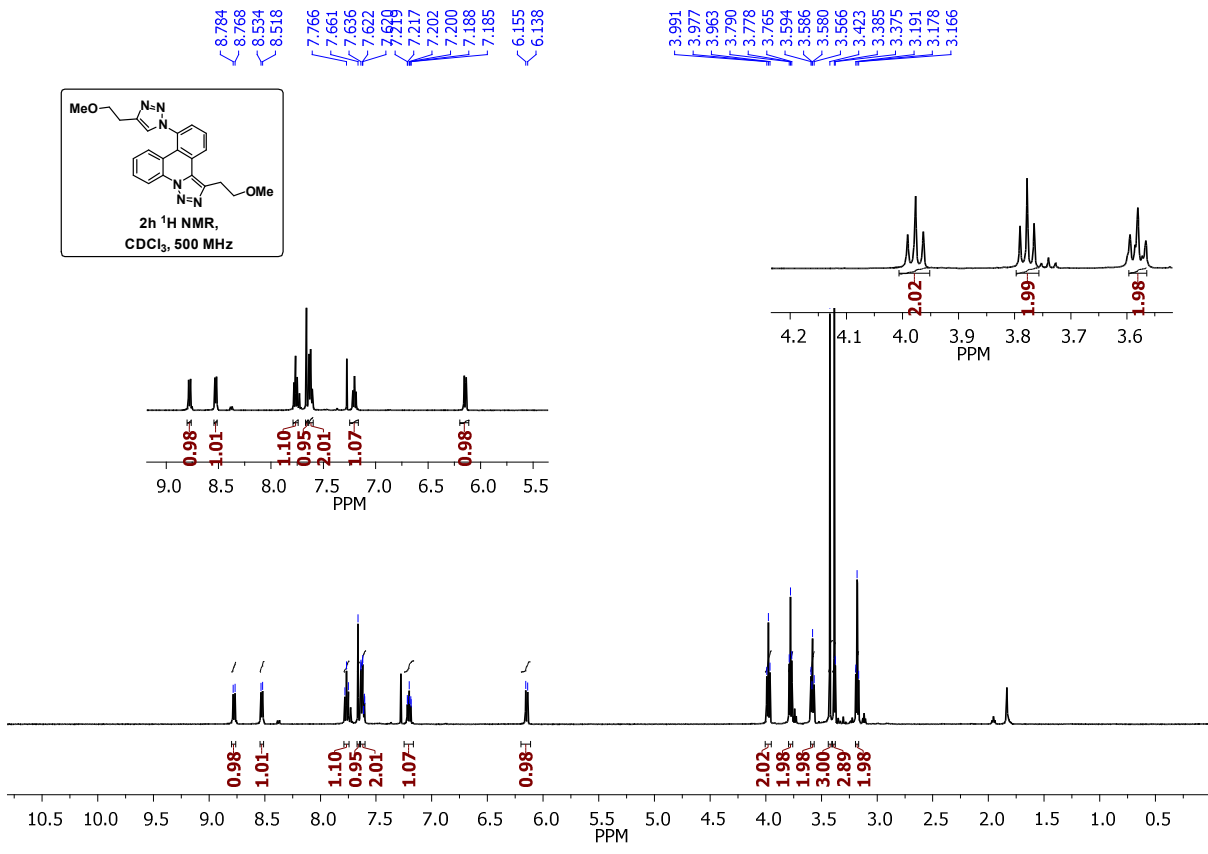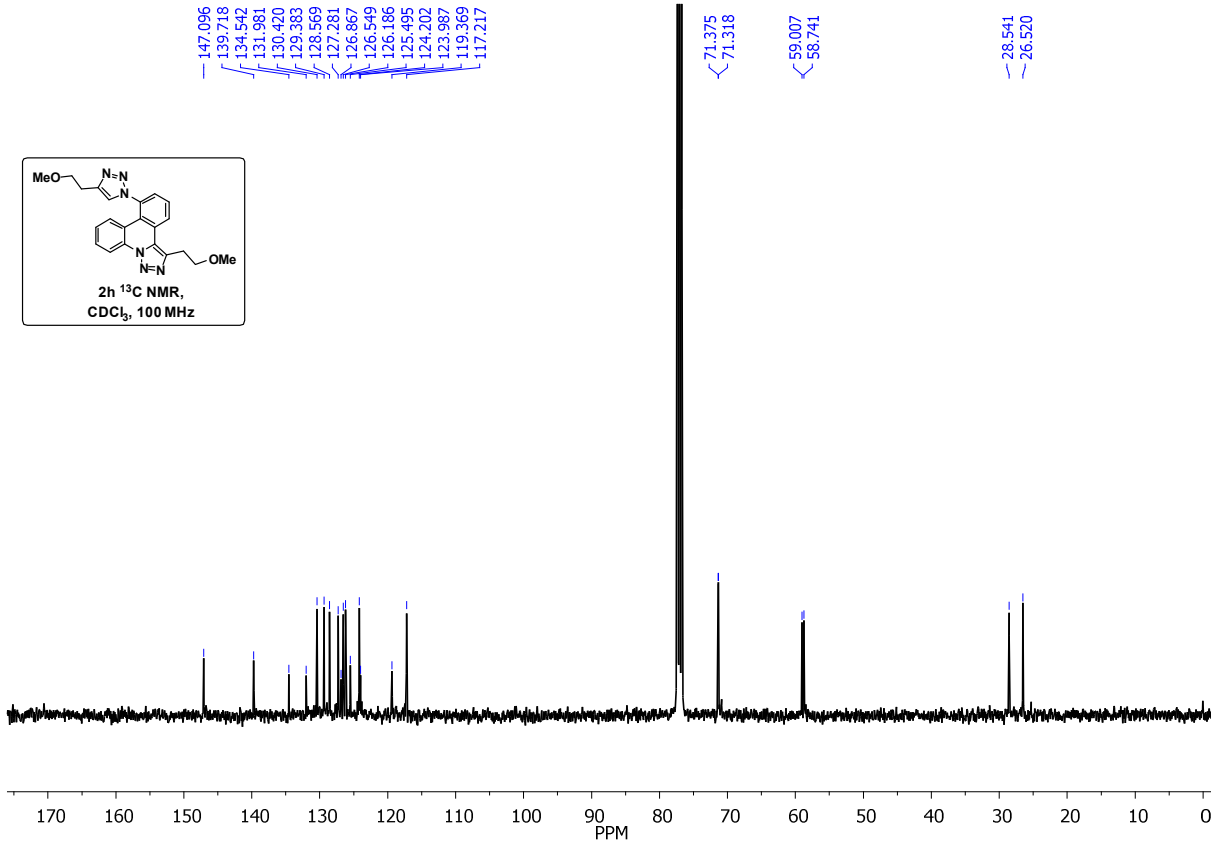

8.832, 8.811, 8.724, 8.721, 8.718, 8.704, 8.701, 8.698, 7.824, 7.814, 7.666, 7.658, 7.265, 7.262, 7.244, 7.241, 7.234, 6.234, 6.212, 5.171, 5.168, 4.826, 3.724, 3.713, 3.707, 3.701, 3.696, 3.689, 3.684, 3.678, 3.672, 3.661, 1.304, 1.286, 1.269, 1.261, 1.260, 1.252

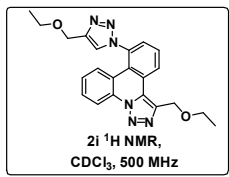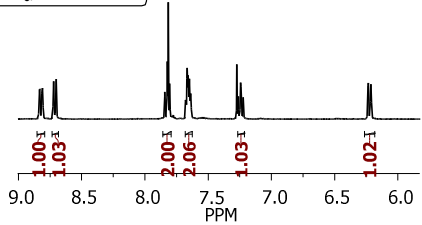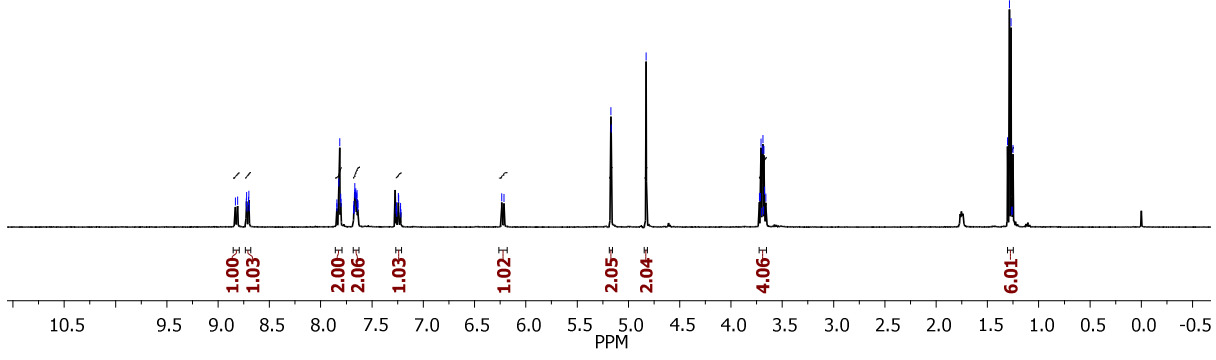

147.291, 139.453, 134.119, 131.777, 130.508, 129.883, 128.910, 128.708, 128.540, 127.566, 126.030, 124.803, 124.746, 124.022, 119.428, 117.329, 66.280, 65.564, 64.817, 64.046, 15.212, 15.174

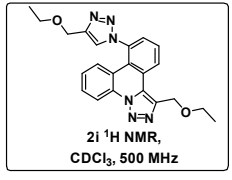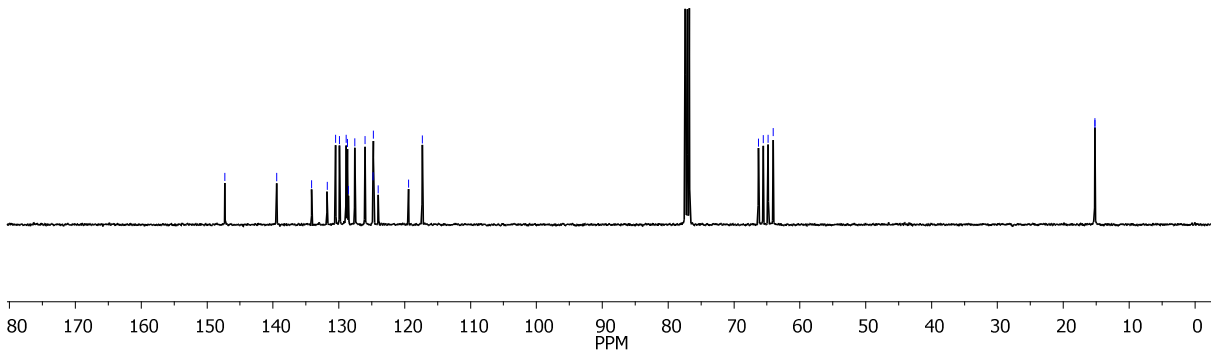

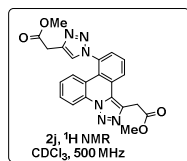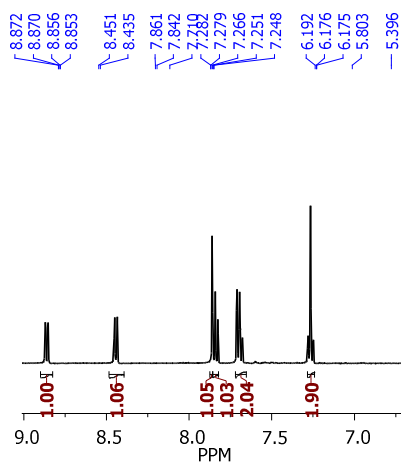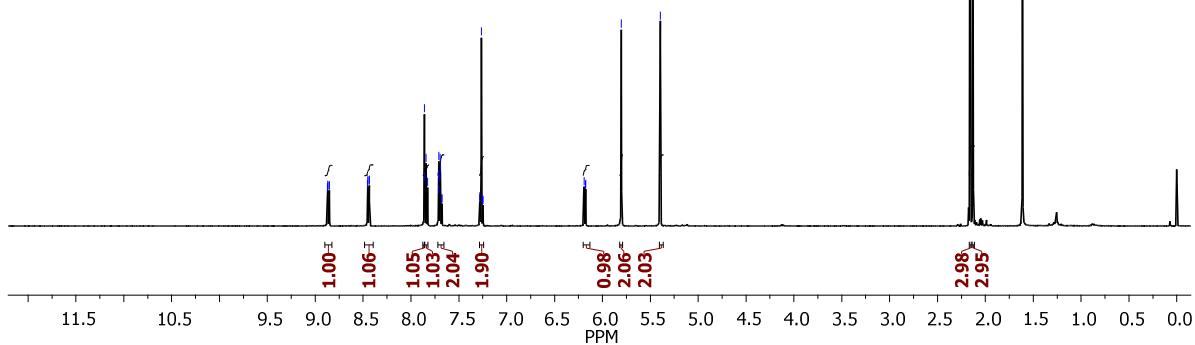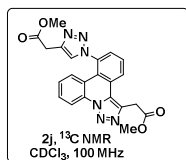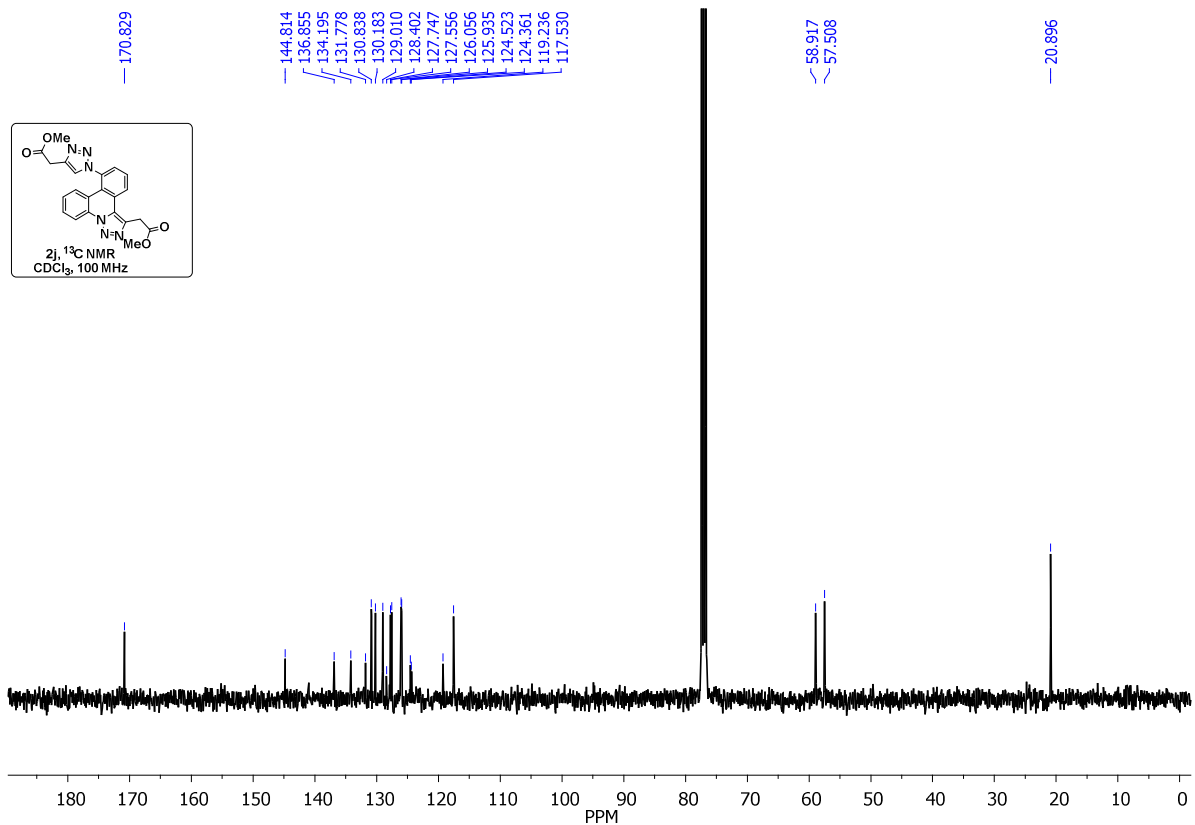

8.852  
8.849  
8.852  
8.829  
8.508  
8.377  
8.373  
8.357  
8.353  
8.078  
8.075  
7.865  
7.862  
7.817  
7.798  
7.778  
7.682  
7.679  
7.658  
7.653  
7.650  
7.634  
7.631  
7.265  
7.259  
7.256  
6.131  
6.128  
6.109  
6.107

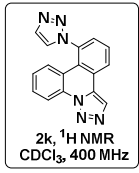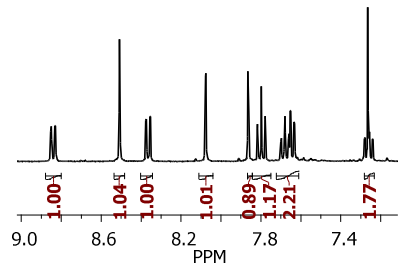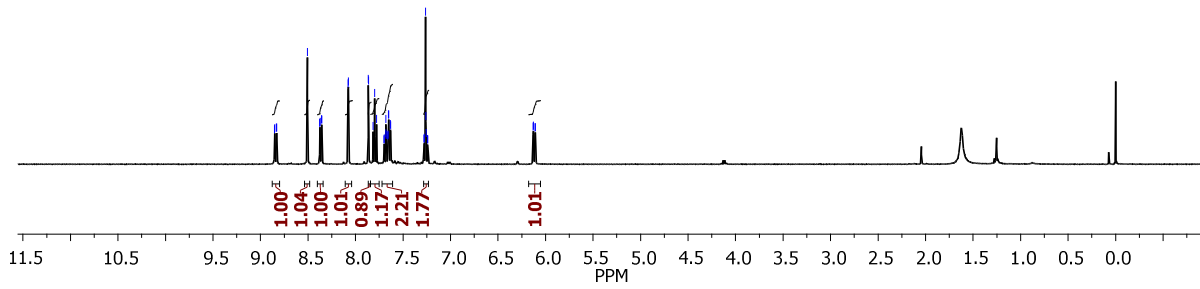

135.331  
134.374  
131.808  
130.662  
130.285  
128.815  
128.023  
127.687  
127.331  
126.030  
125.913  
124.289  
124.030  
119.355  
117.418

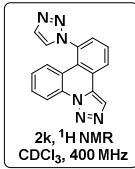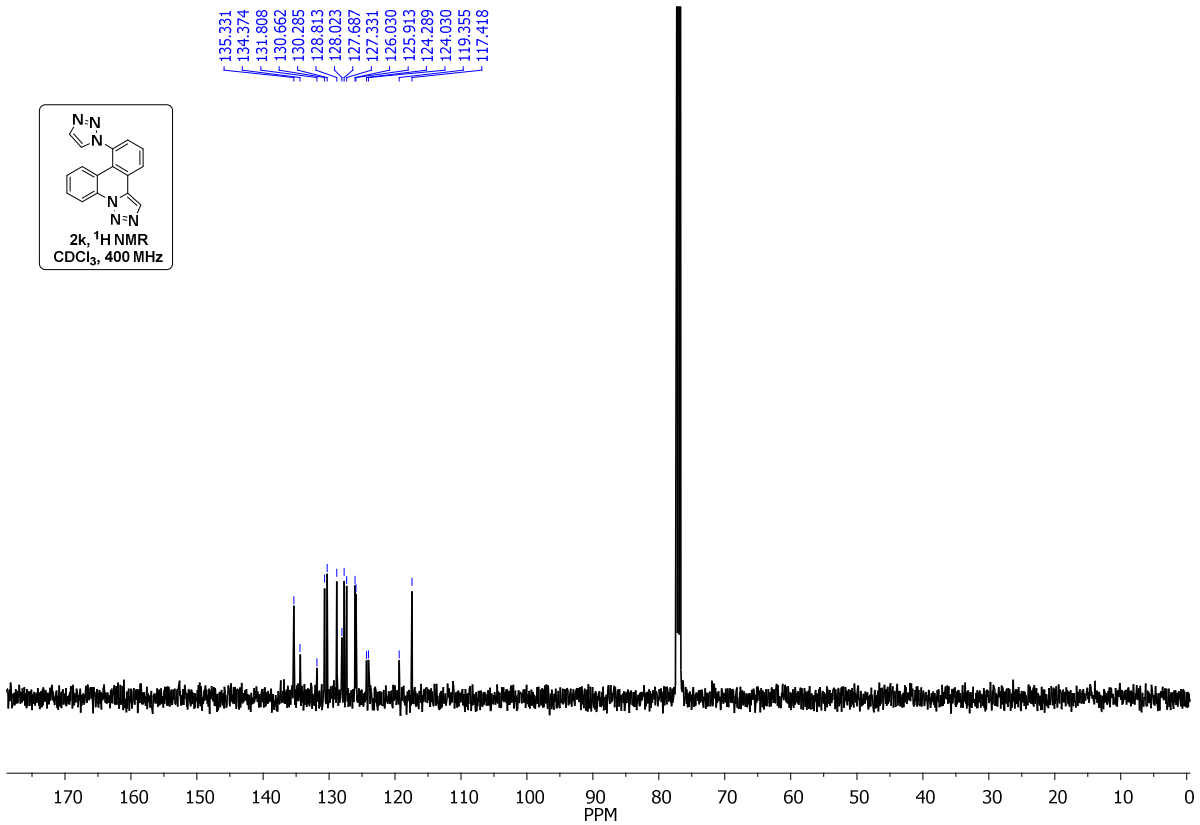



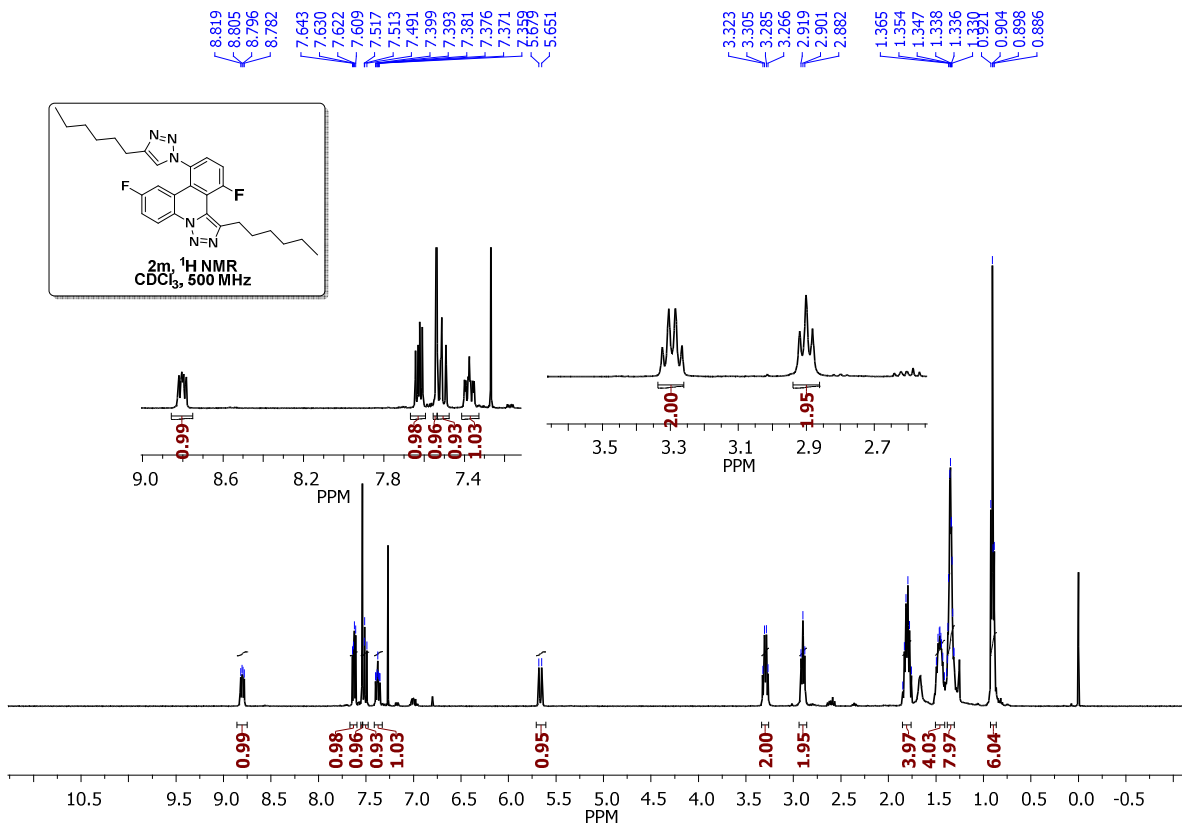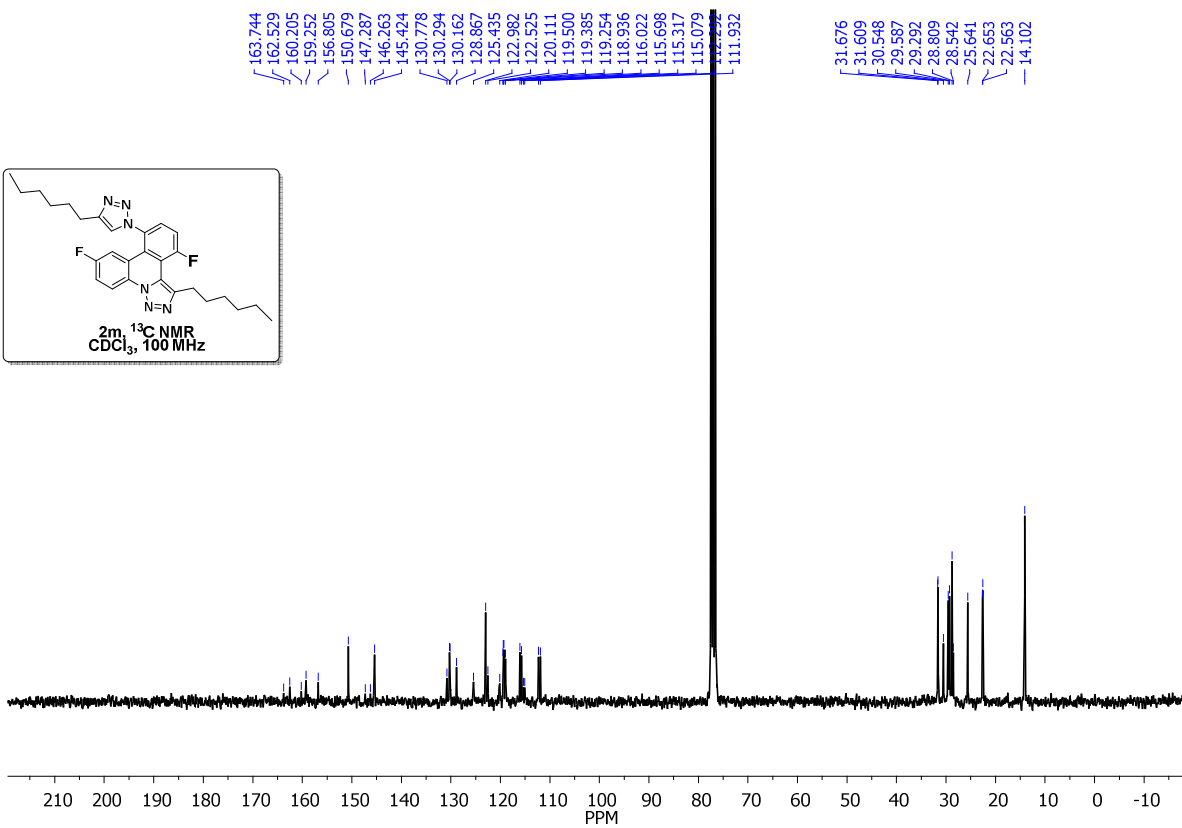



8.746  
8.742  
8.276  
8.272  
7.627  
7.622  
7.554  
7.267  
7.163  
7.159  
7.145  
7.141  
6.000  
5.981

3.273  
3.257  
3.242  
2.912  
2.897  
2.882  
1.964  
1.949  
1.934  
1.816  
1.801  
1.786  
0.966  
0.960  
0.951  
0.946  
0.941  
0.932  
0.926

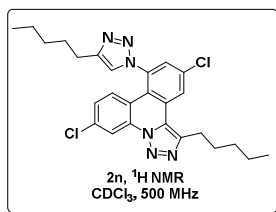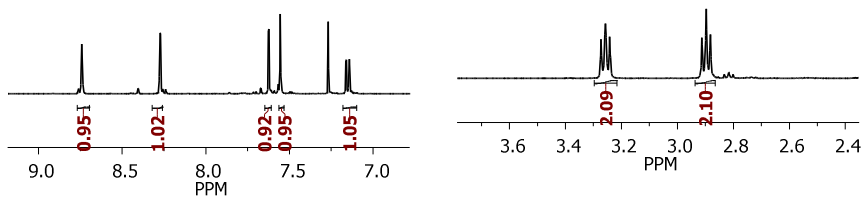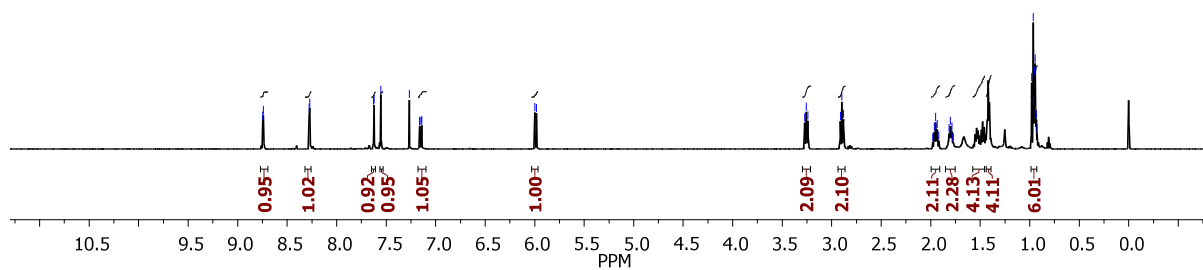

150.567  
143.713  
136.953  
135.364  
134.667  
132.456  
129.360  
127.770  
127.273  
126.408  
125.799  
125.173  
122.830  
121.896  
117.196

31.633  
31.363  
29.181  
27.848  
27.572  
25.588  
22.452  
14.065

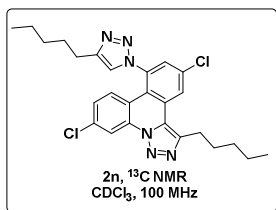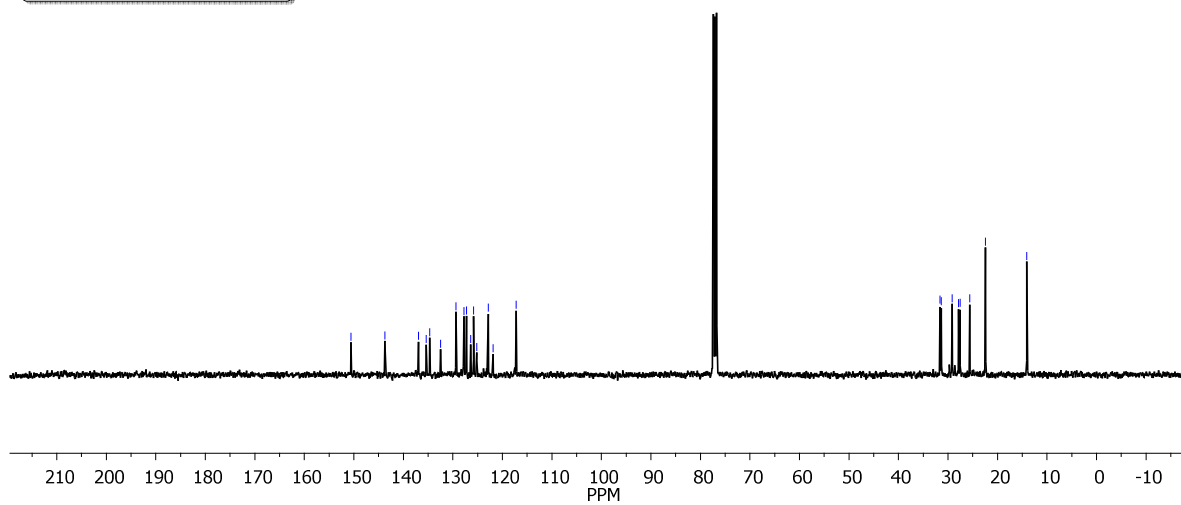

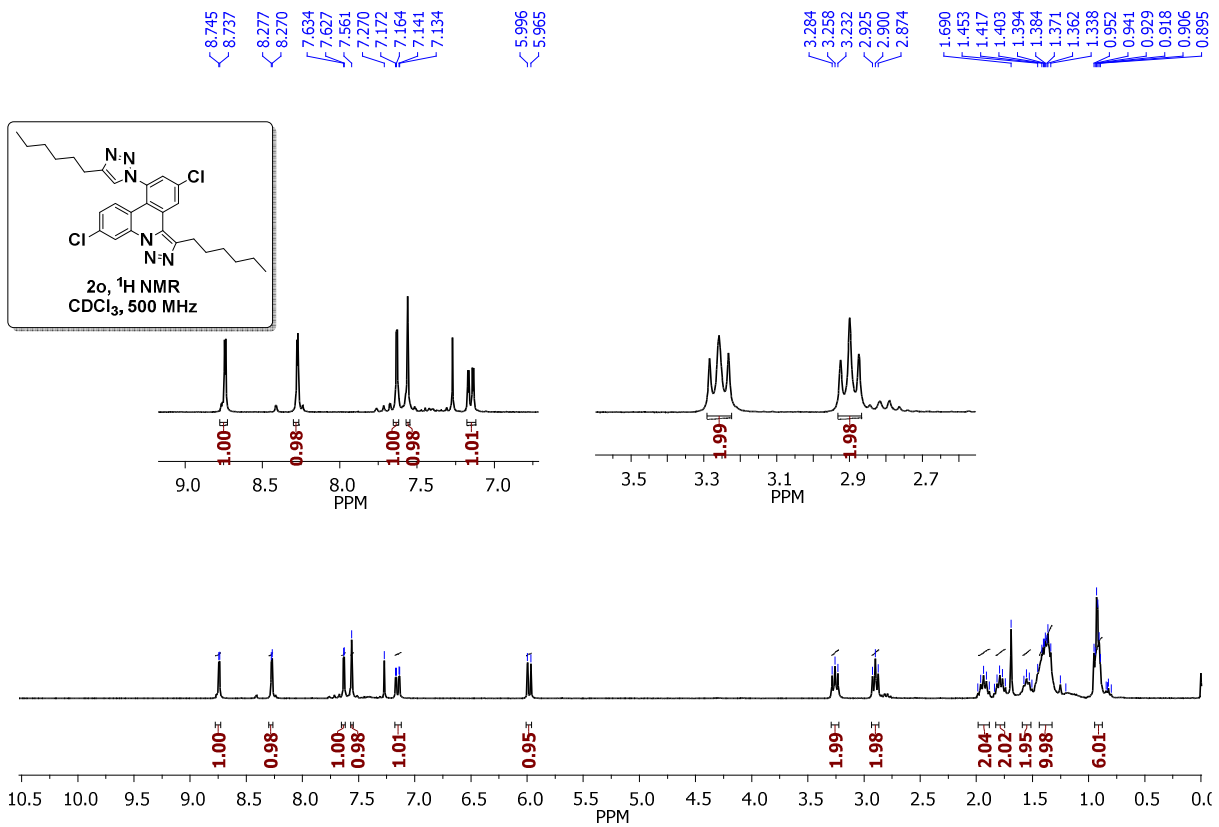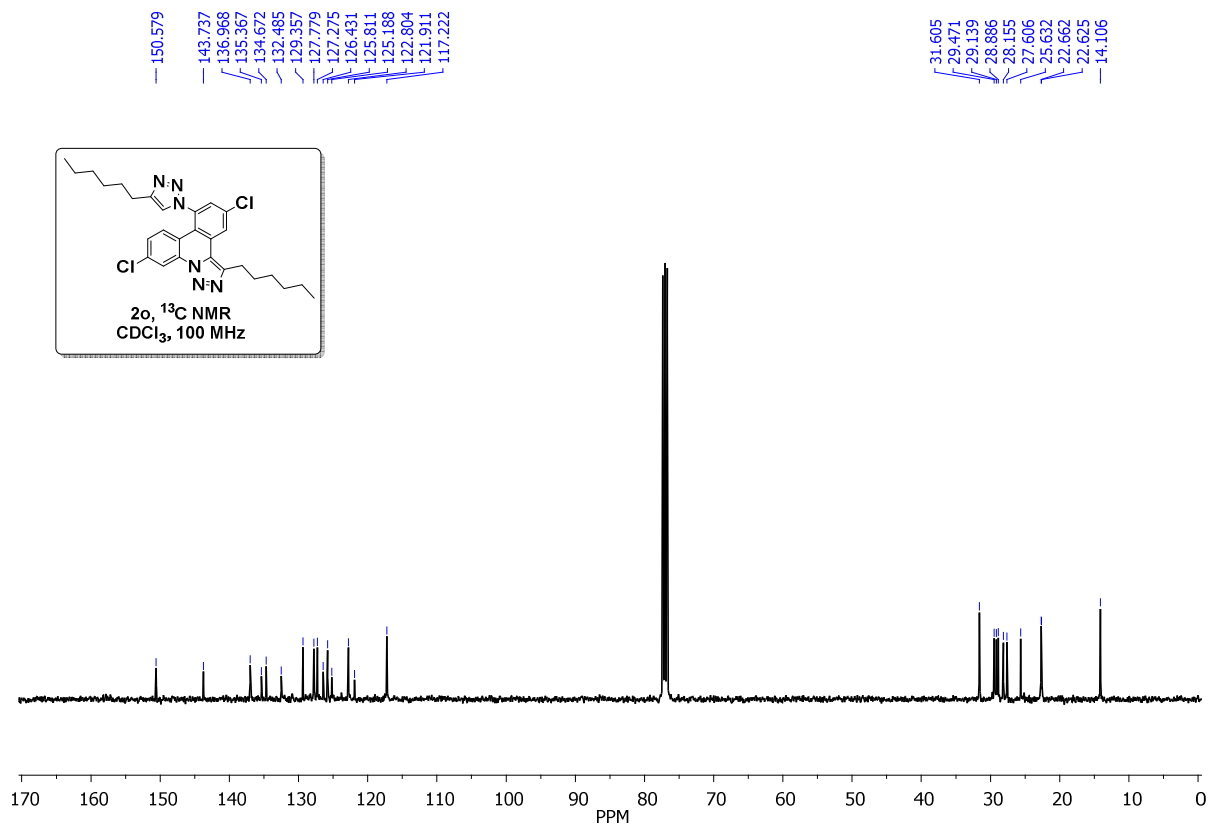

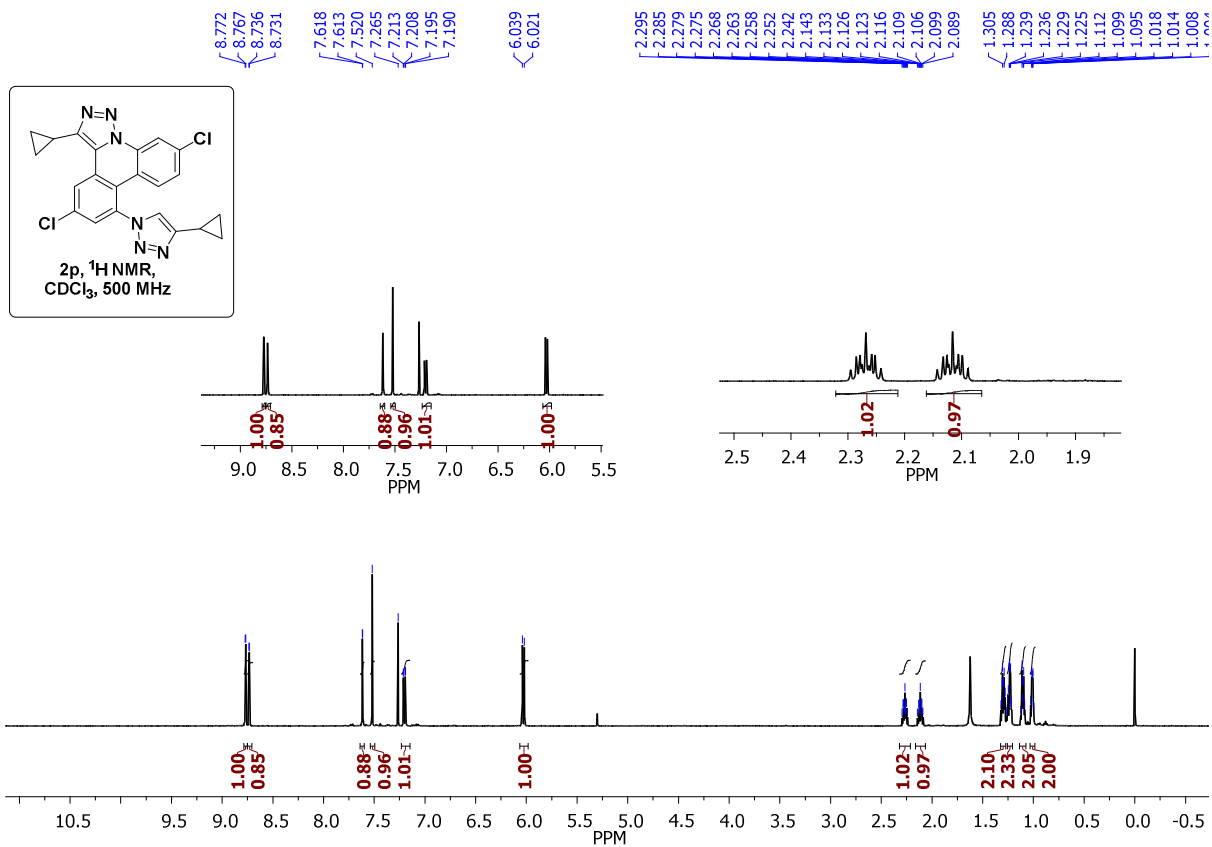



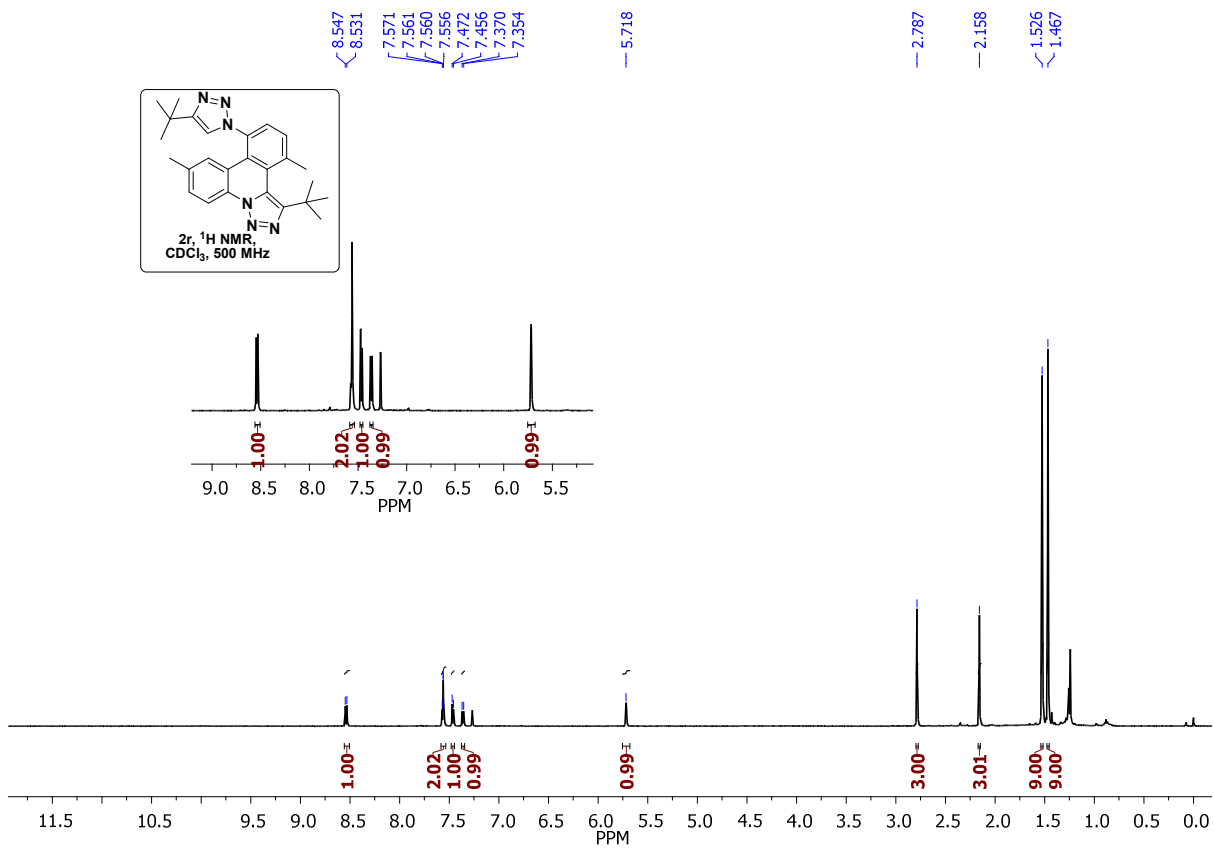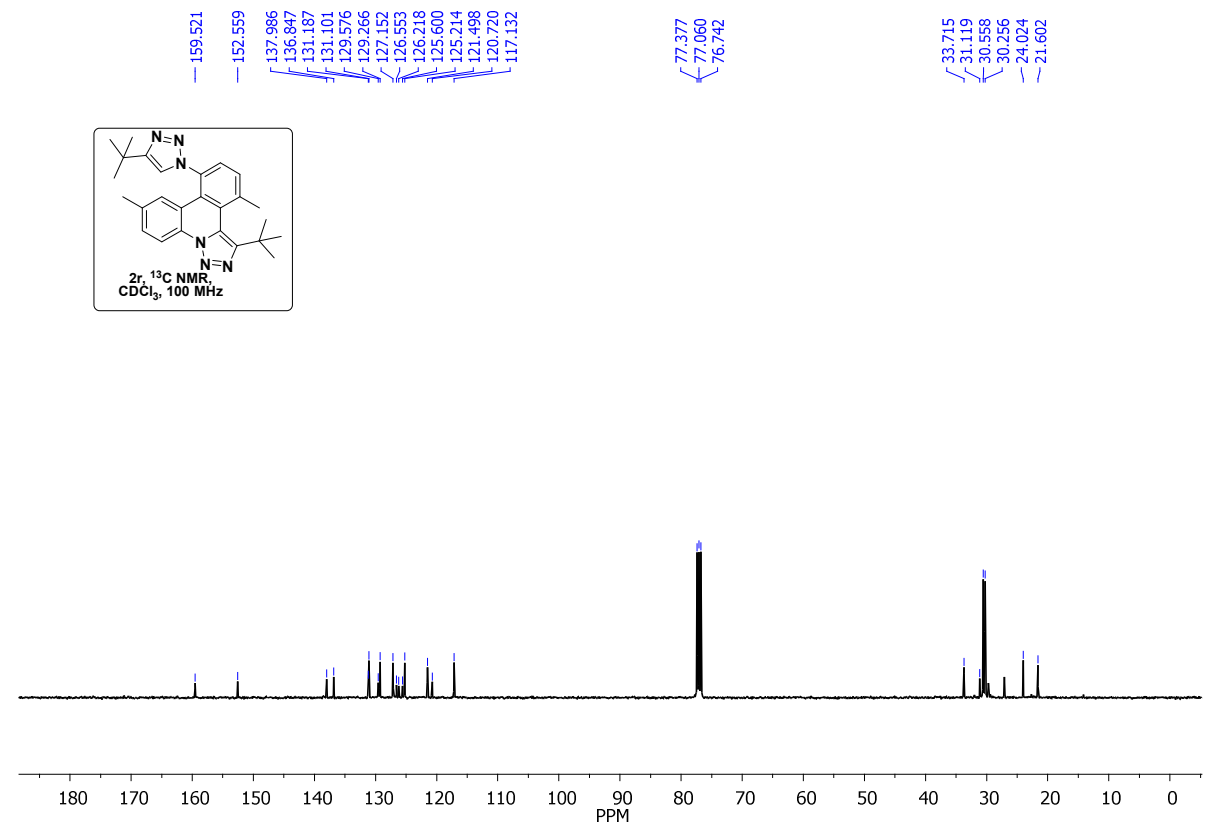

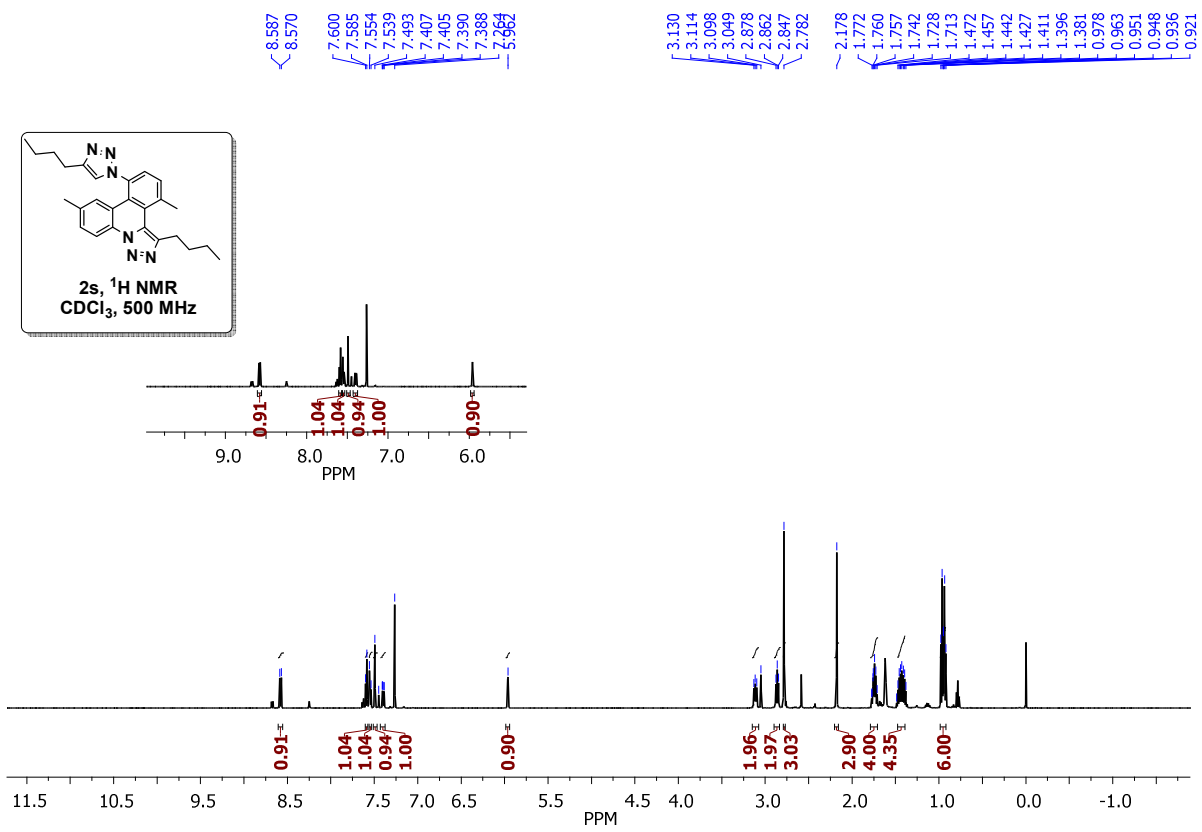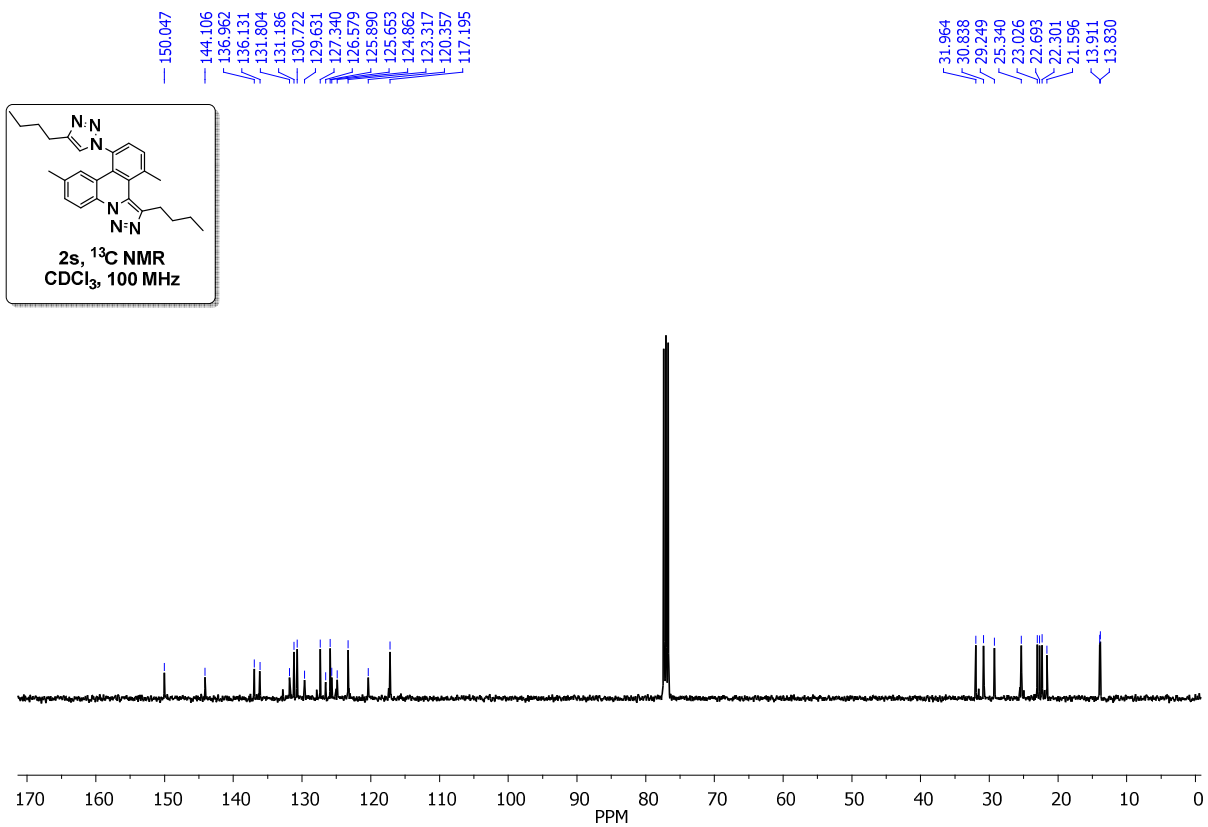

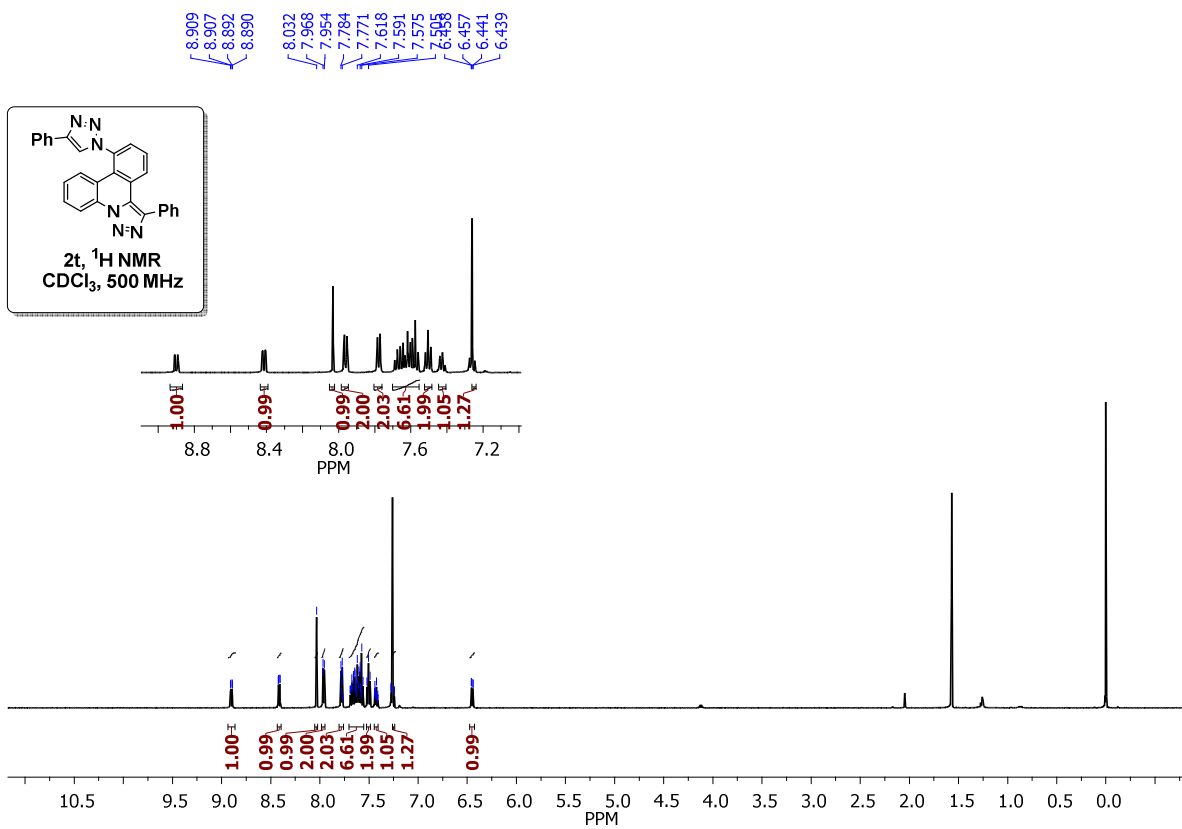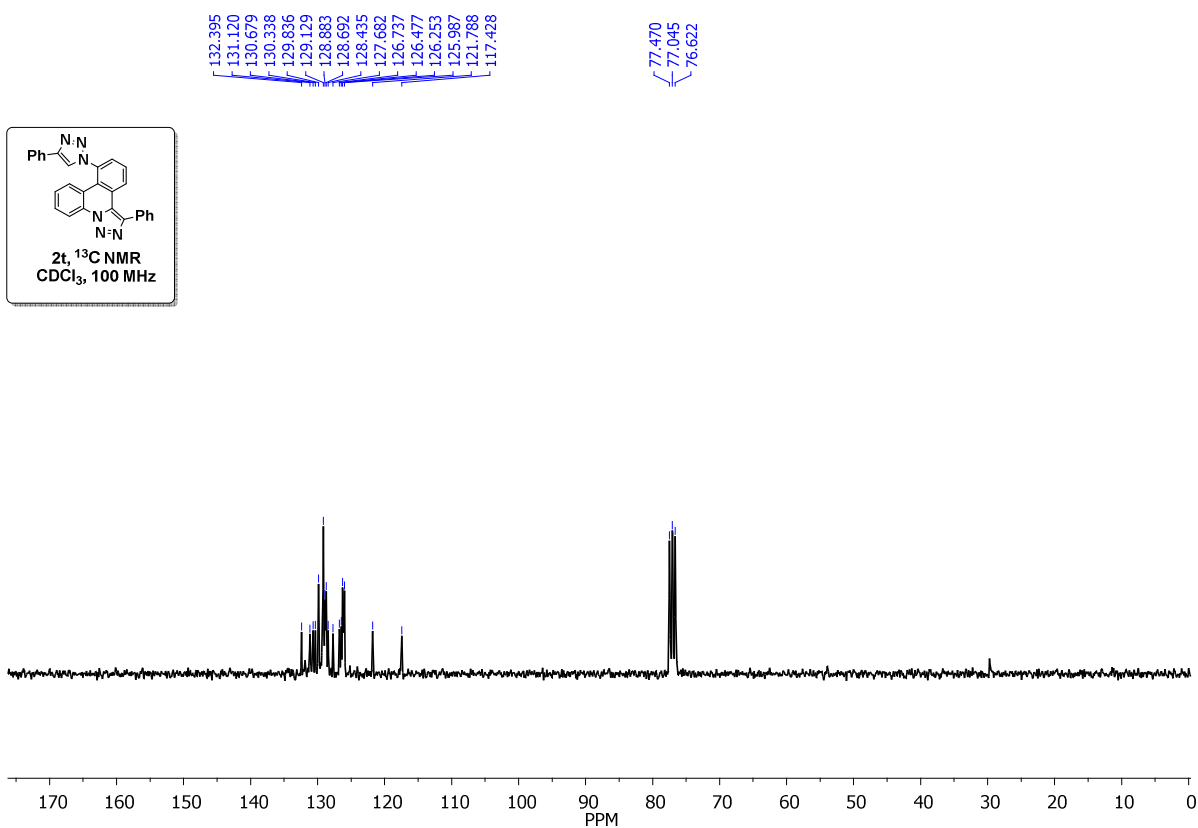

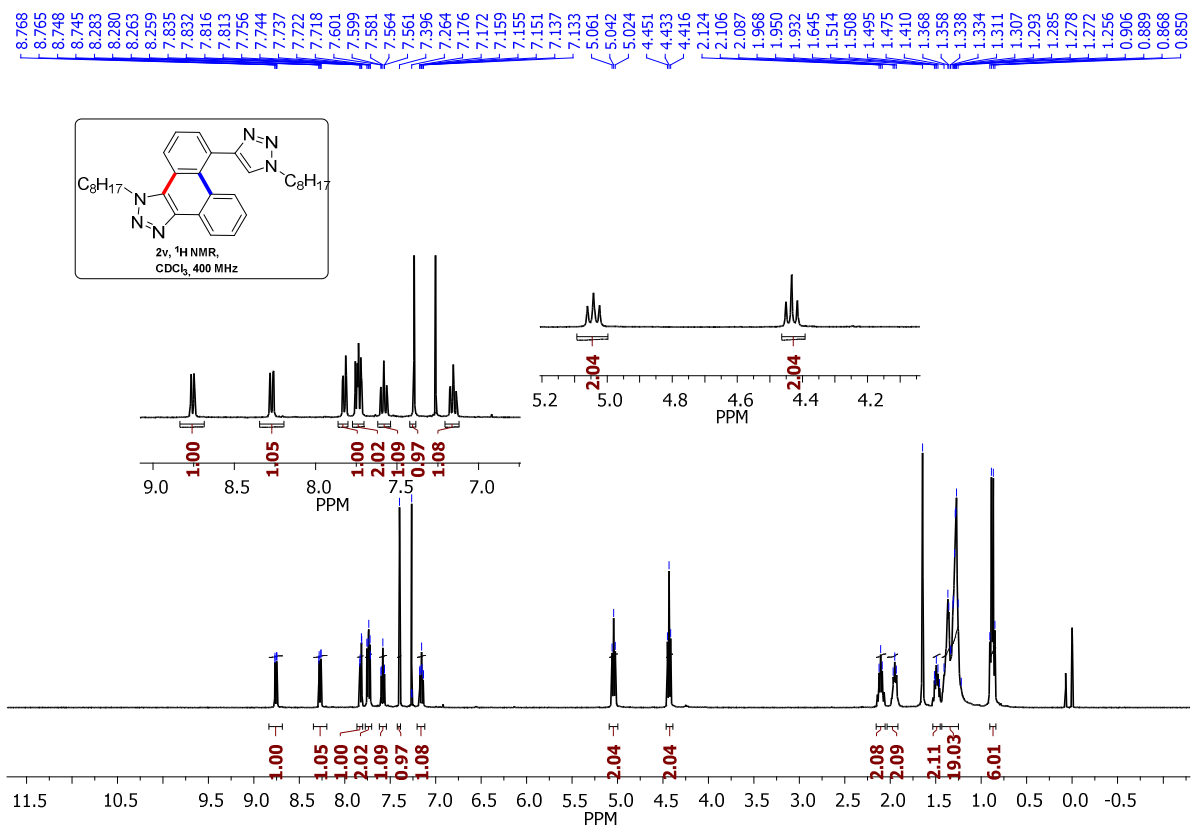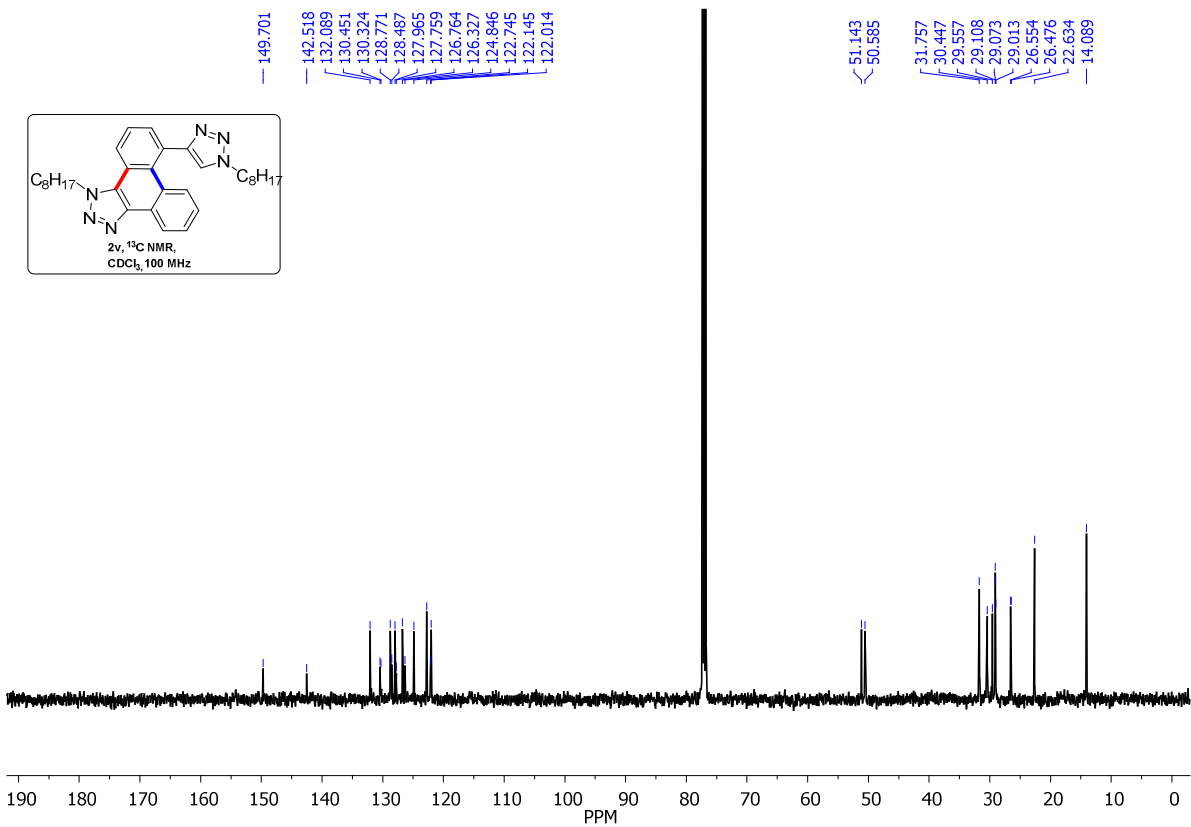



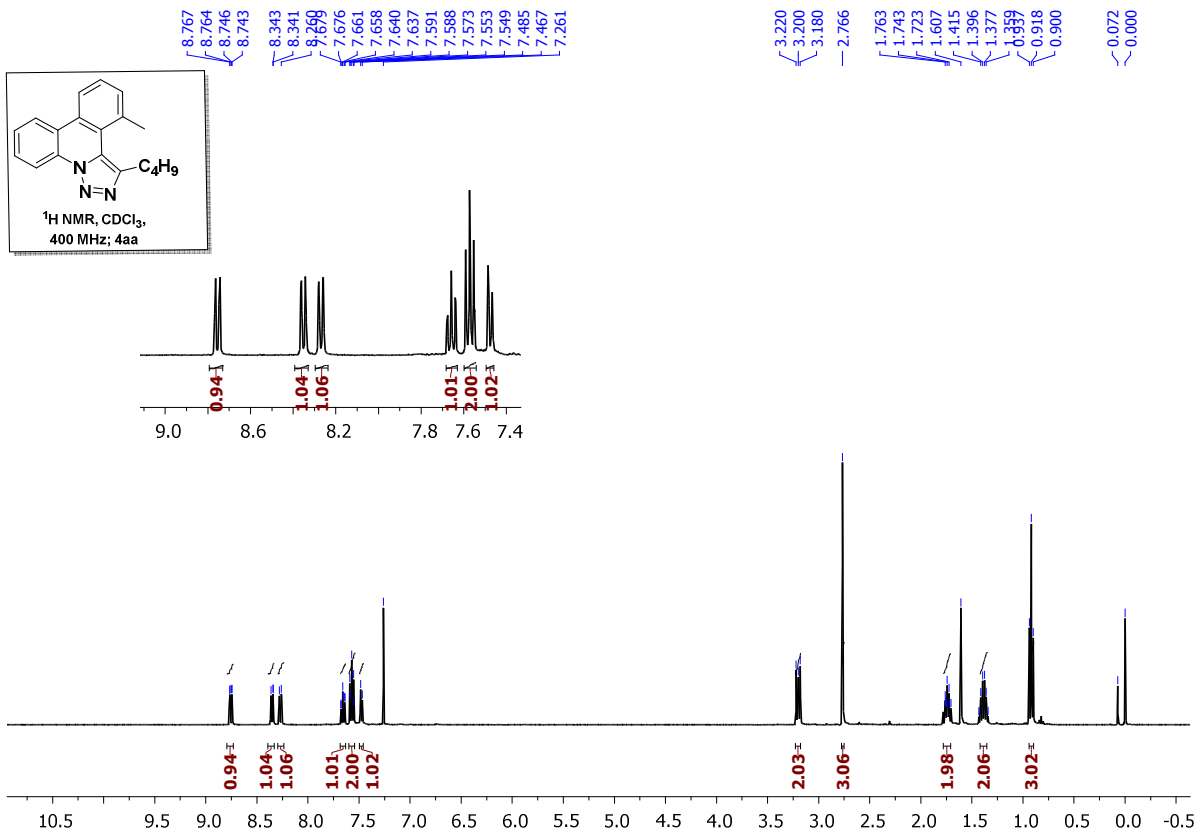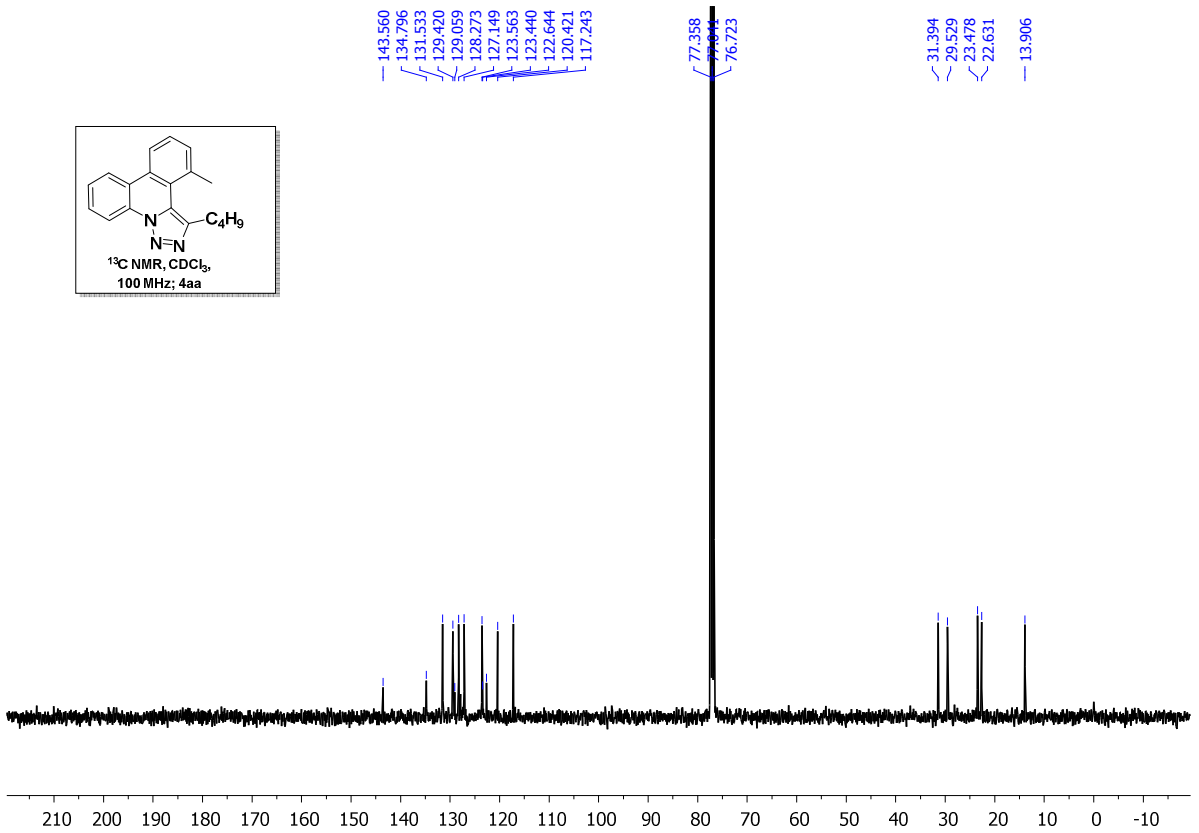

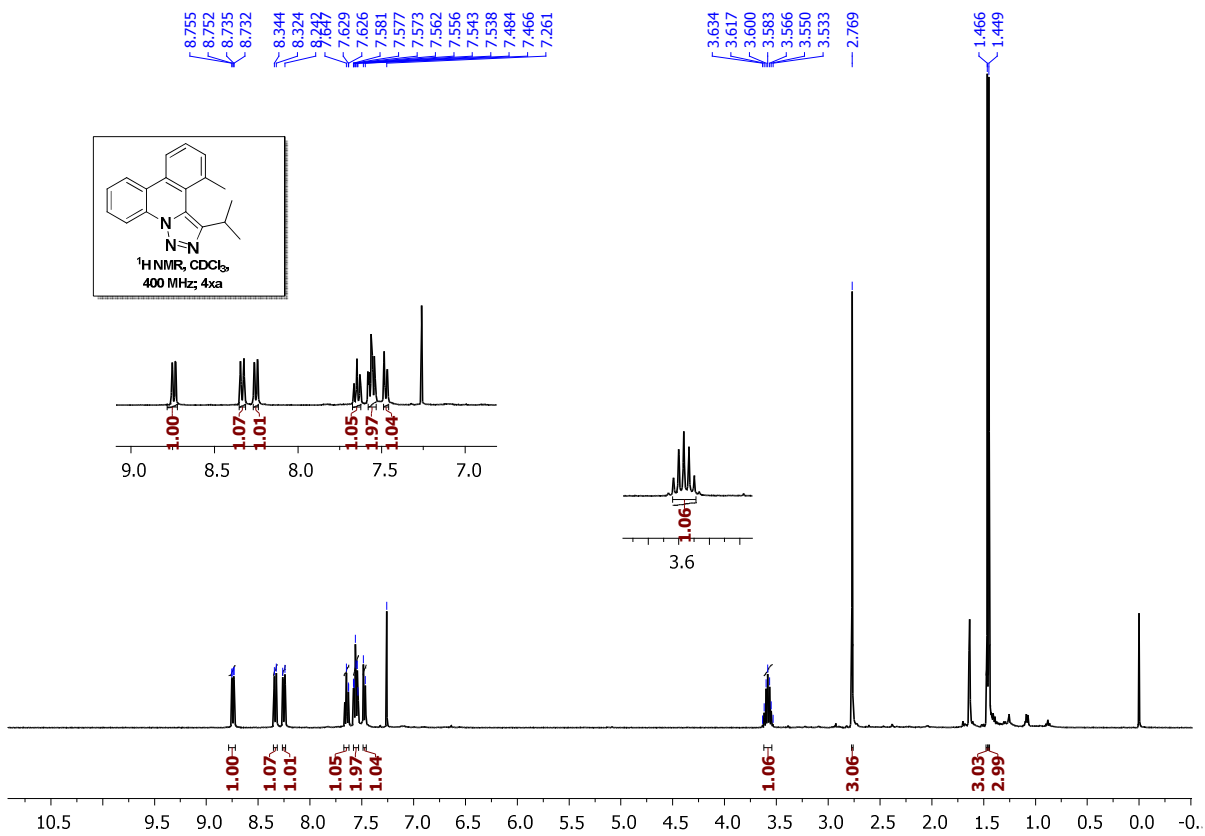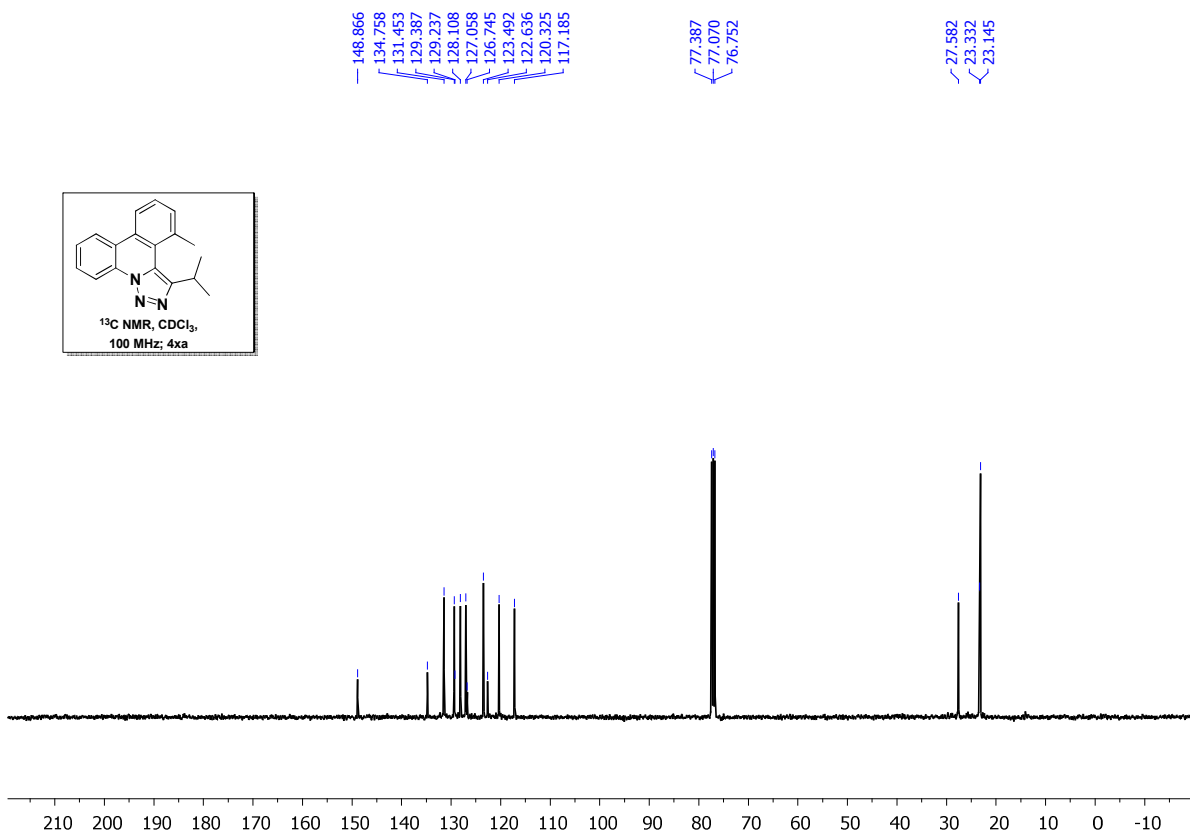

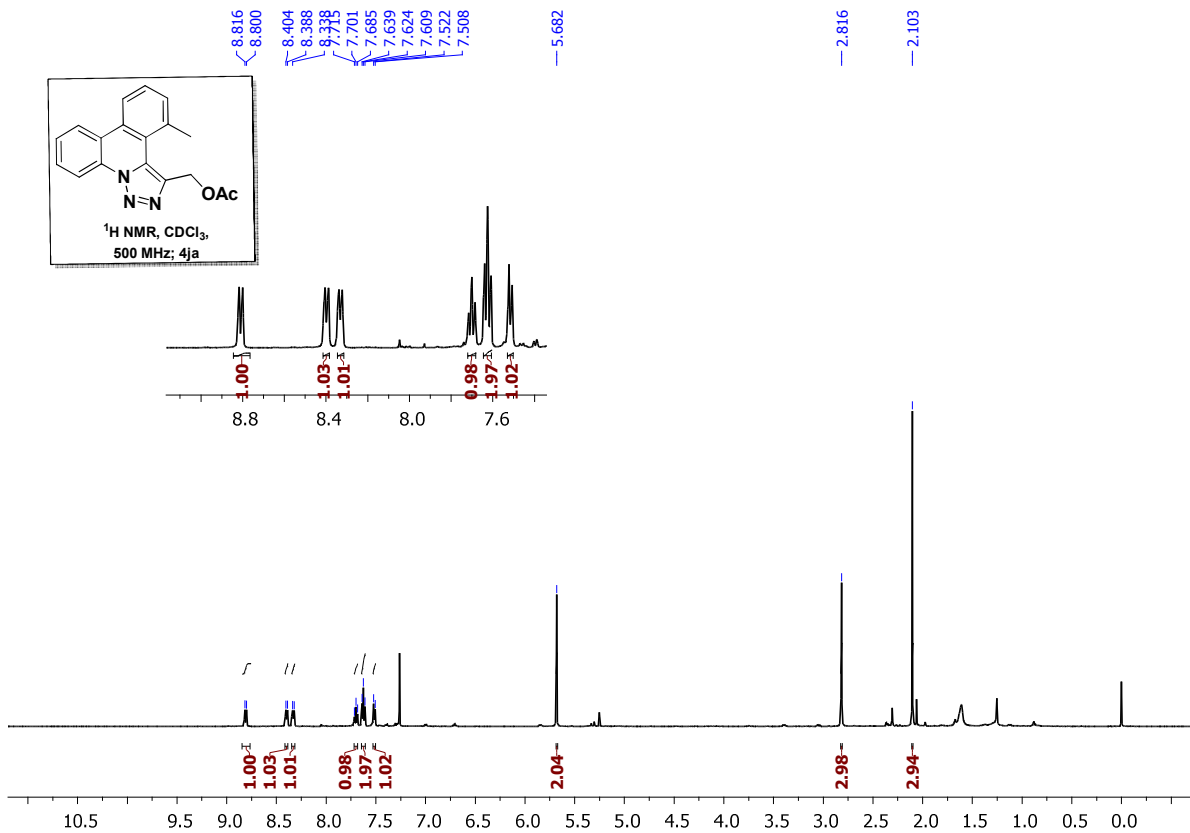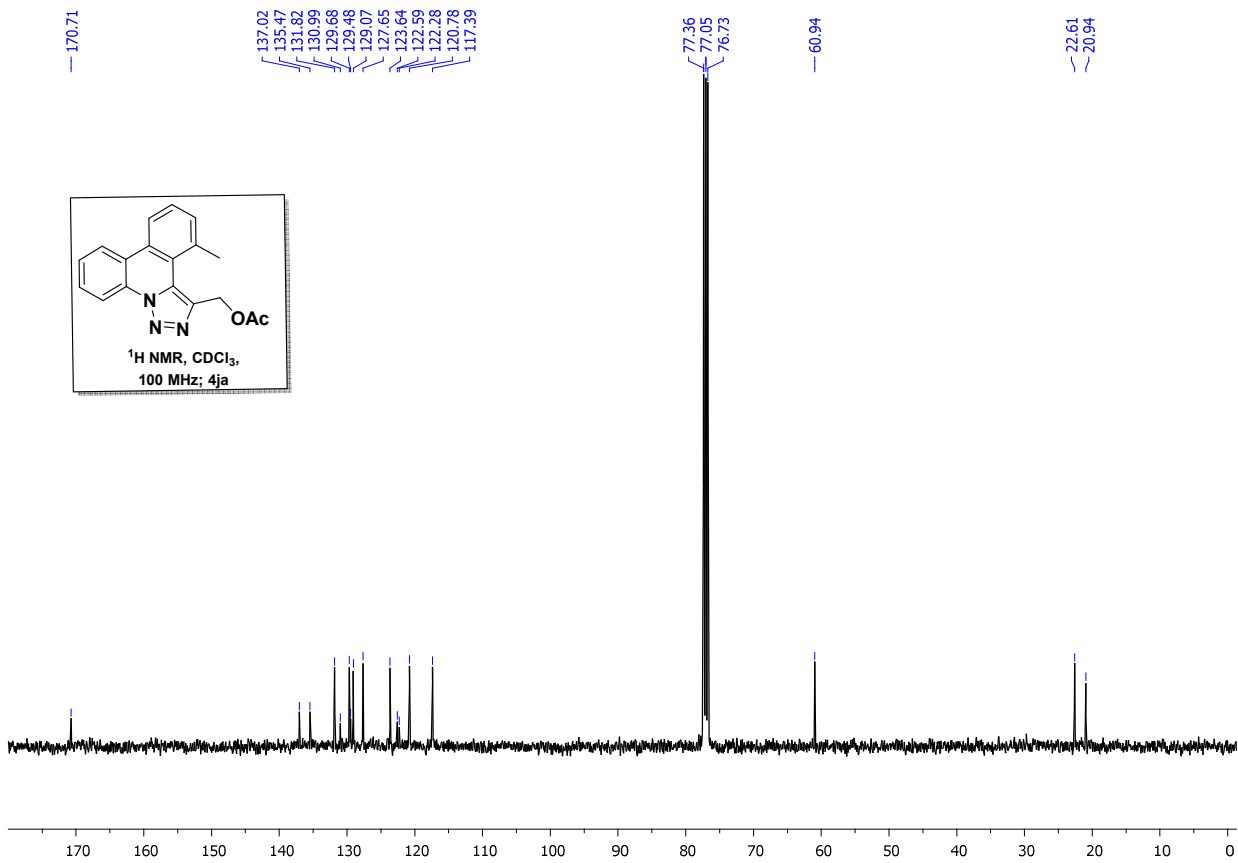

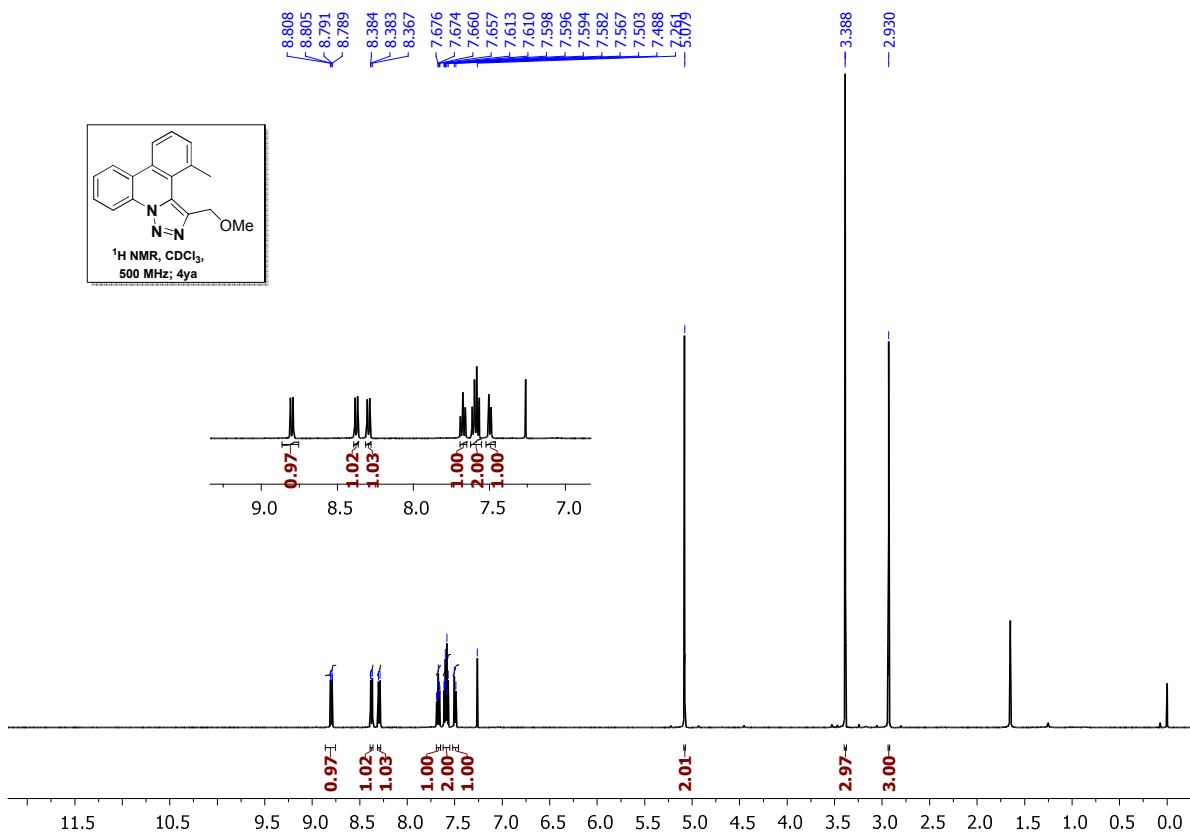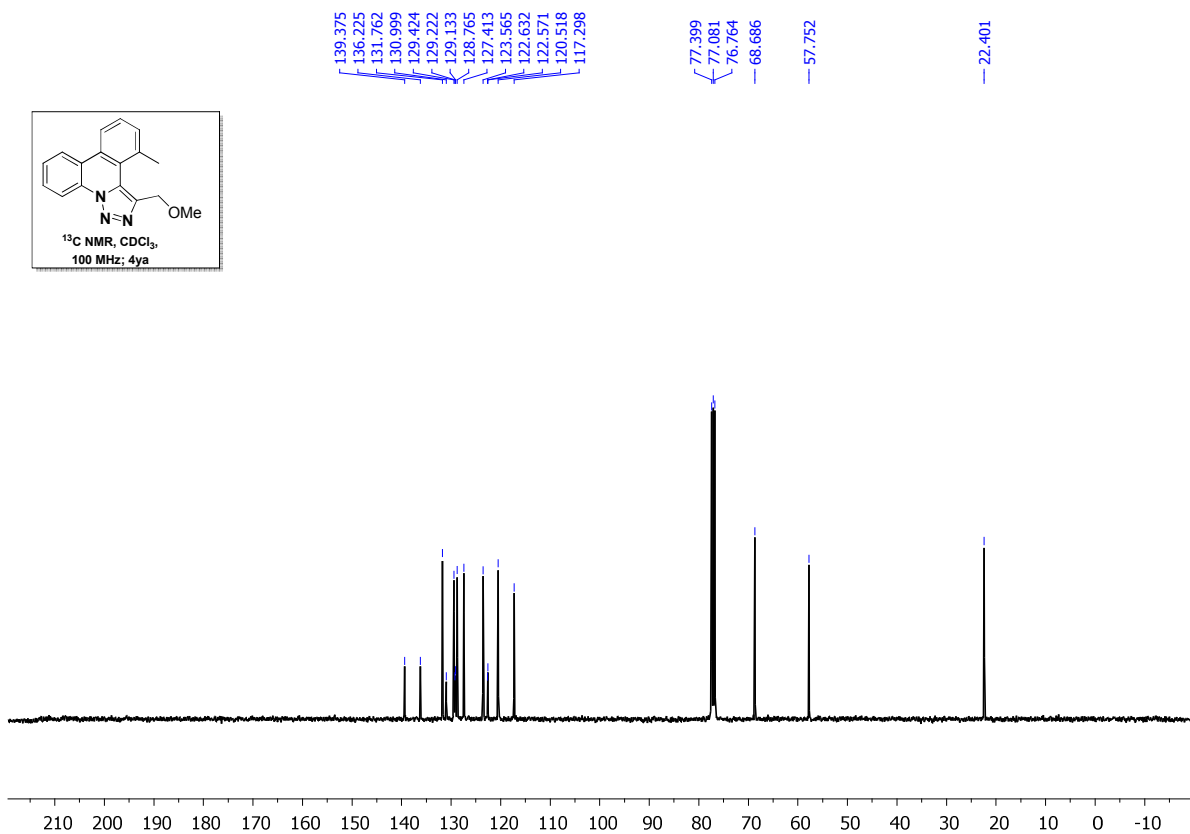

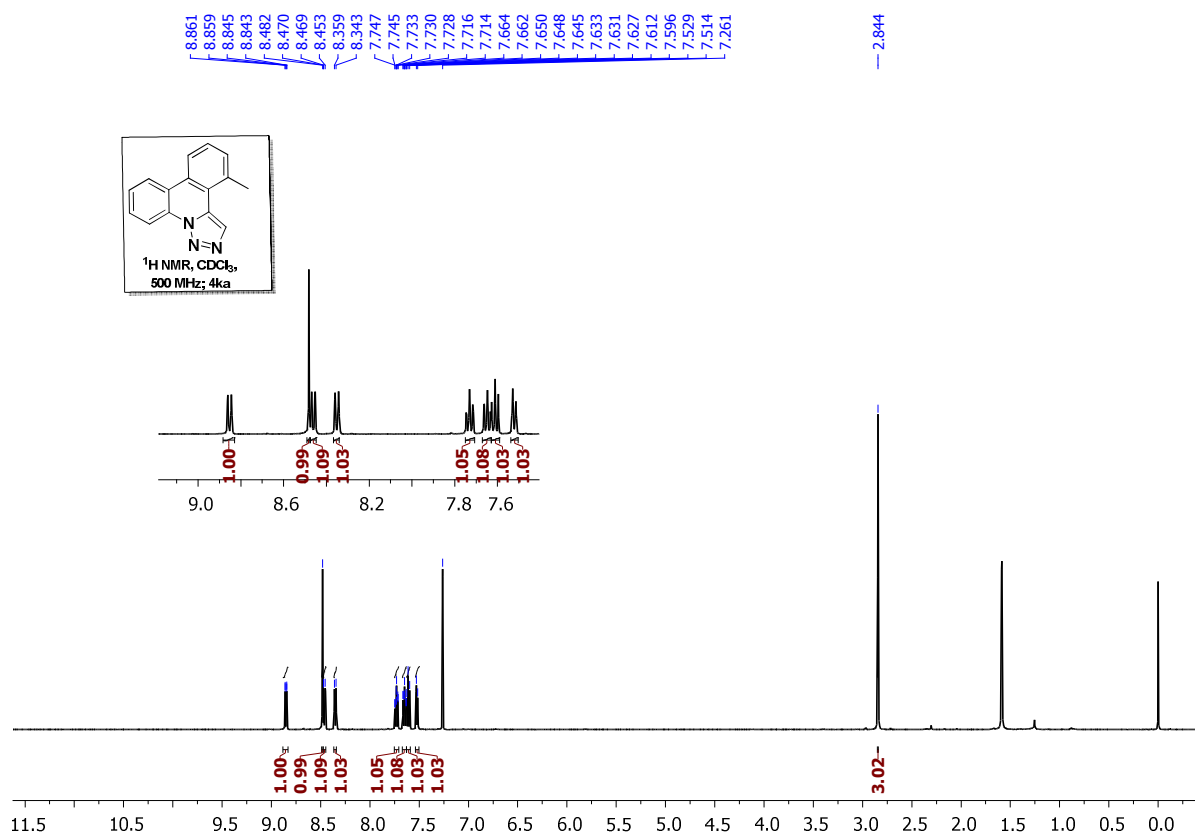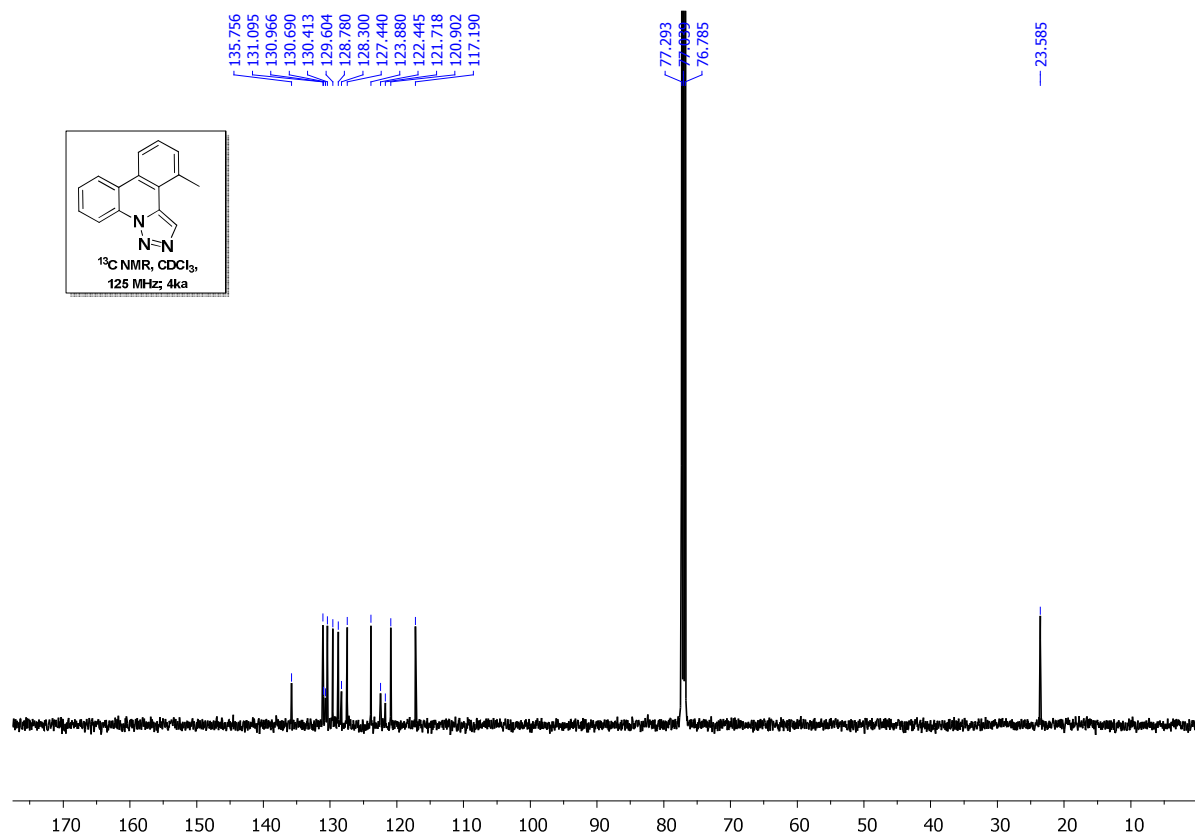

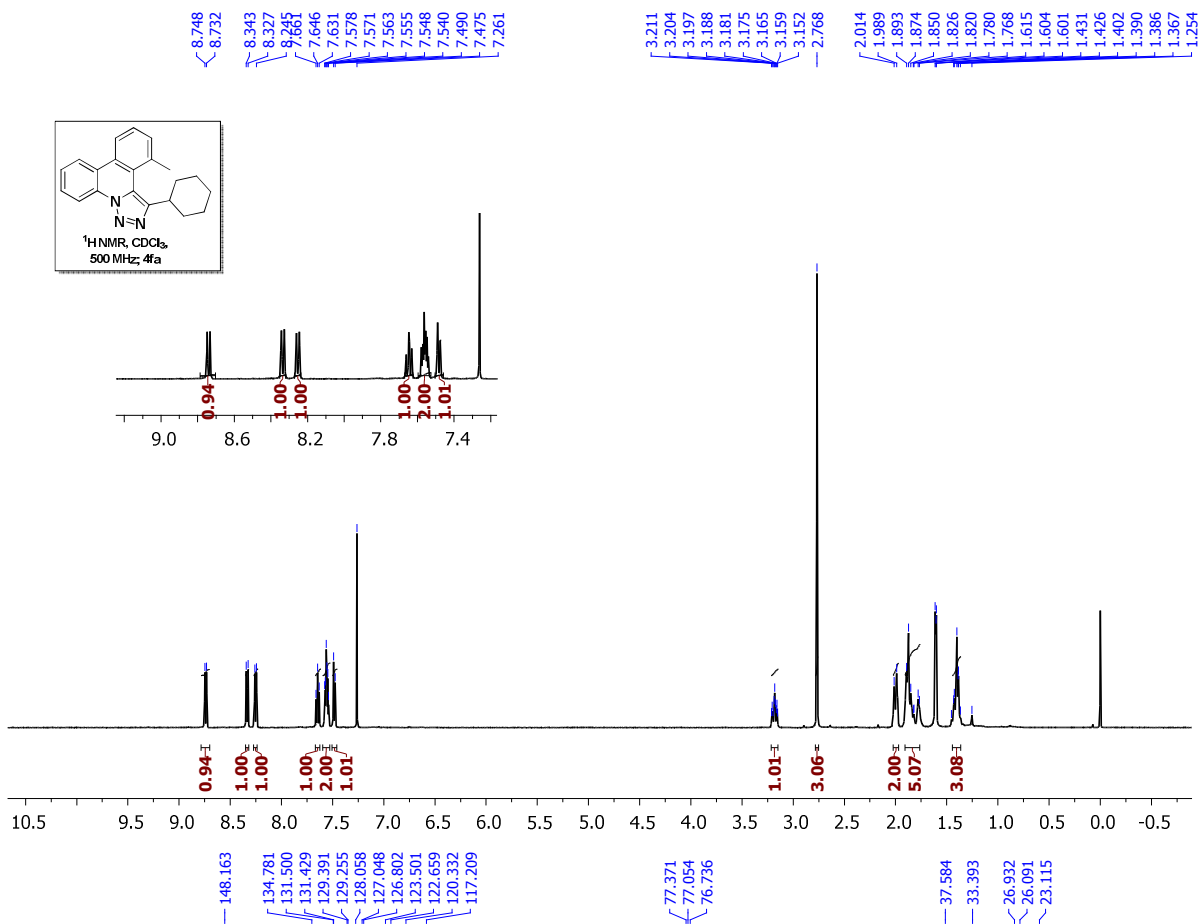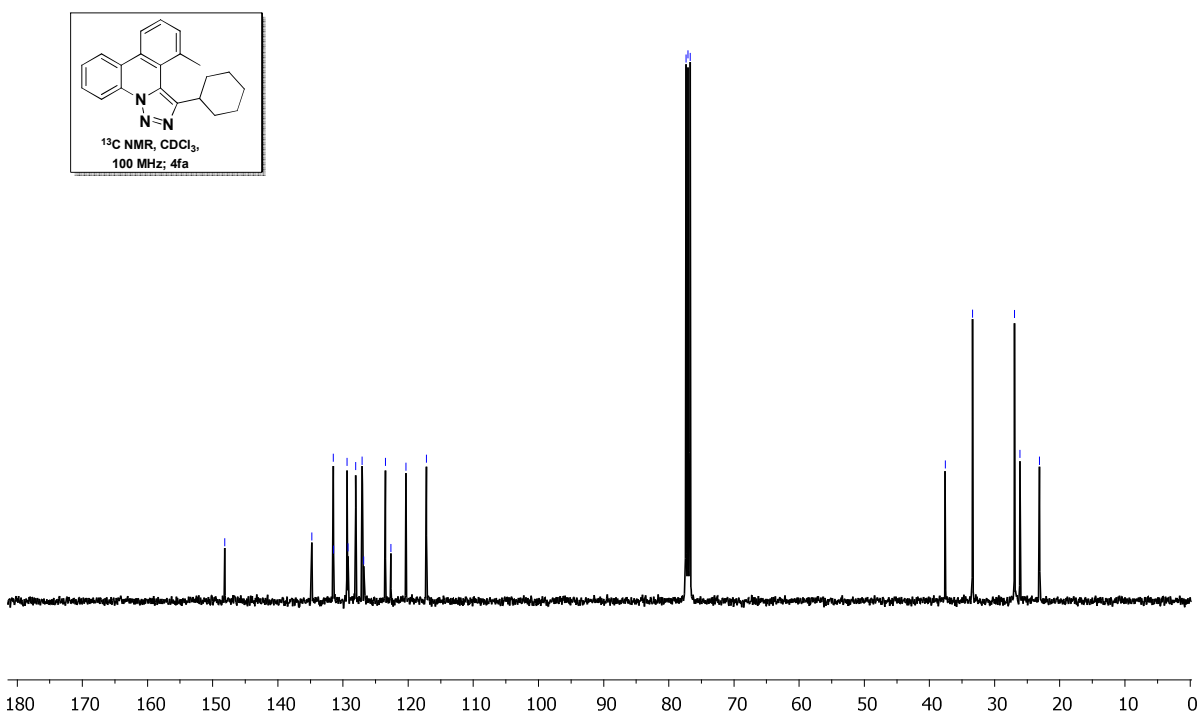

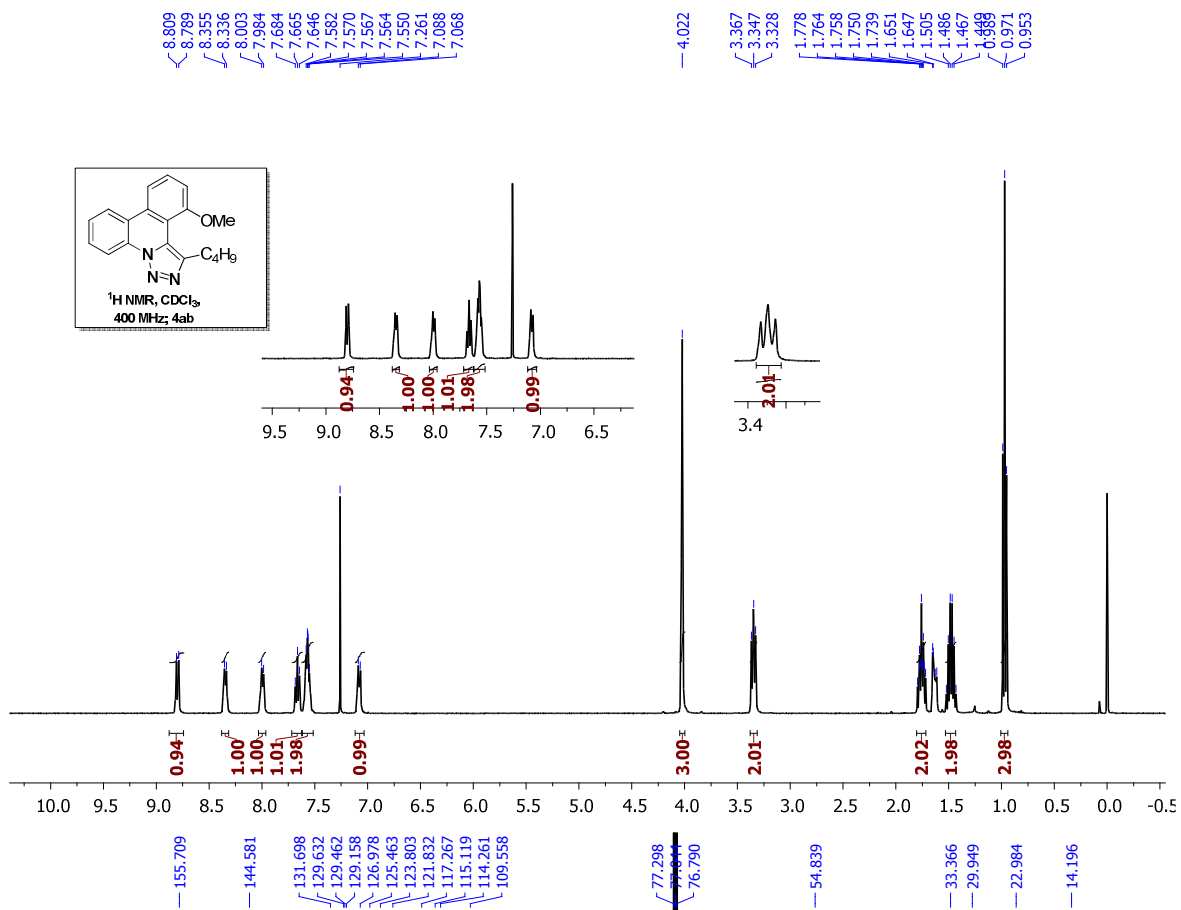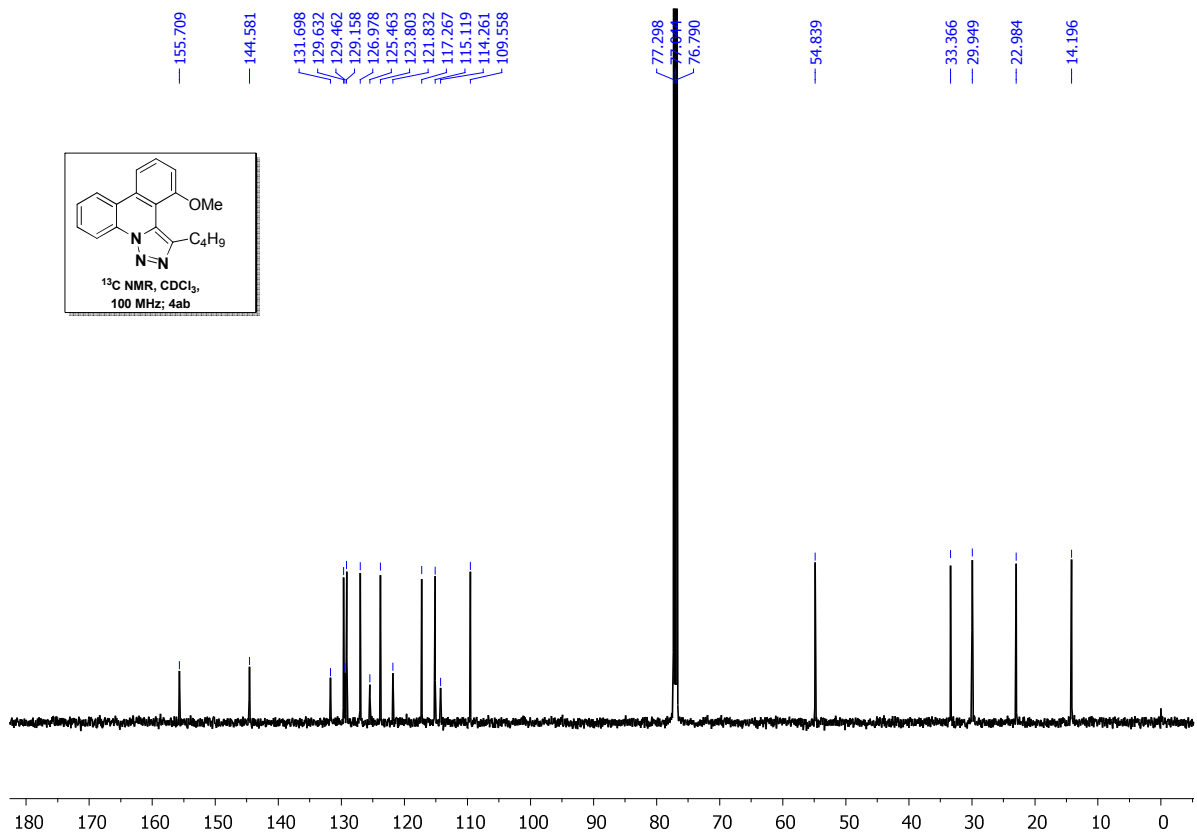

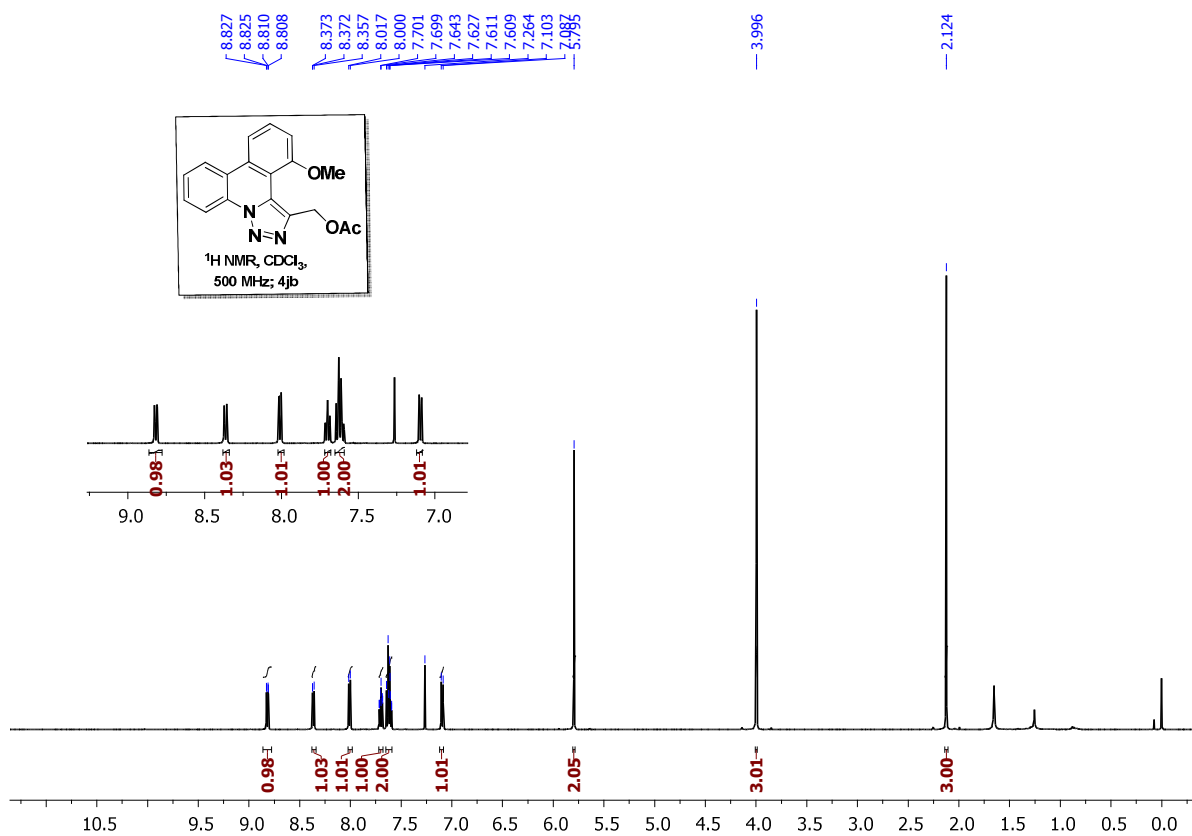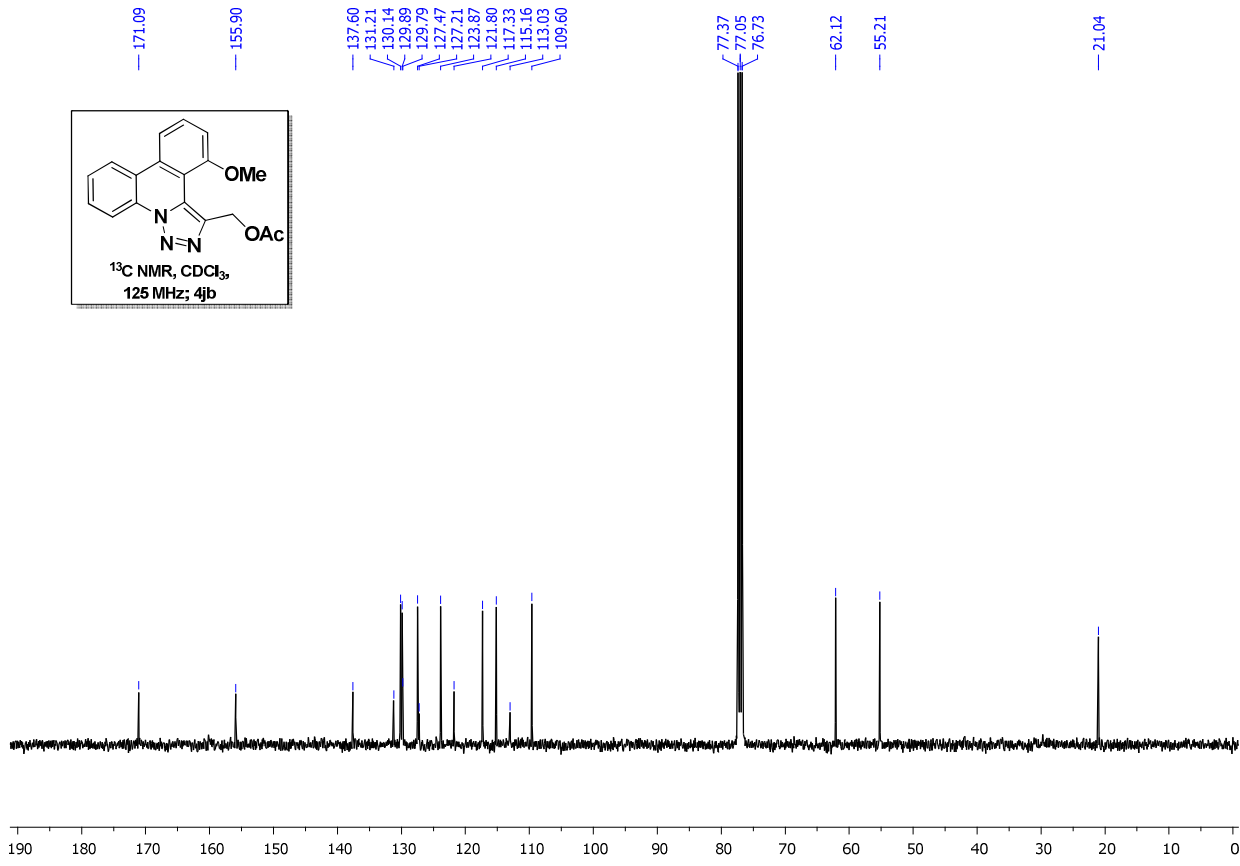



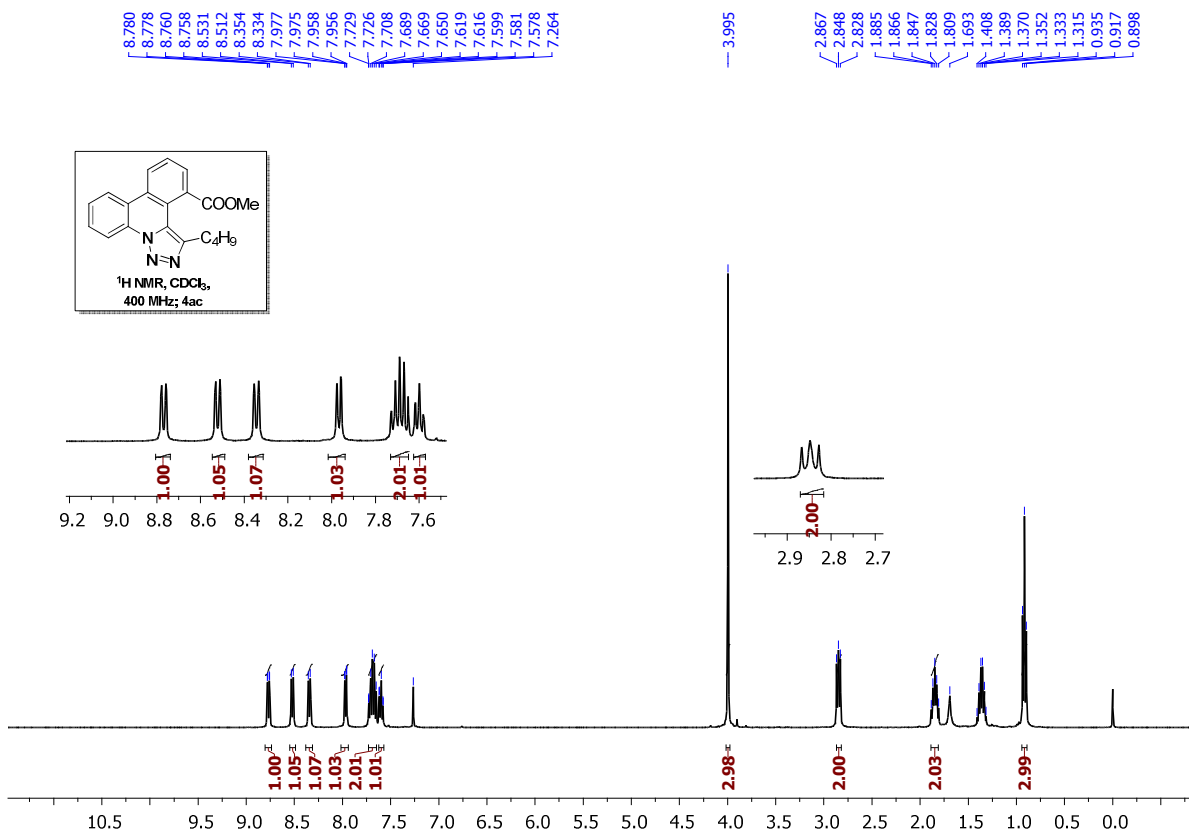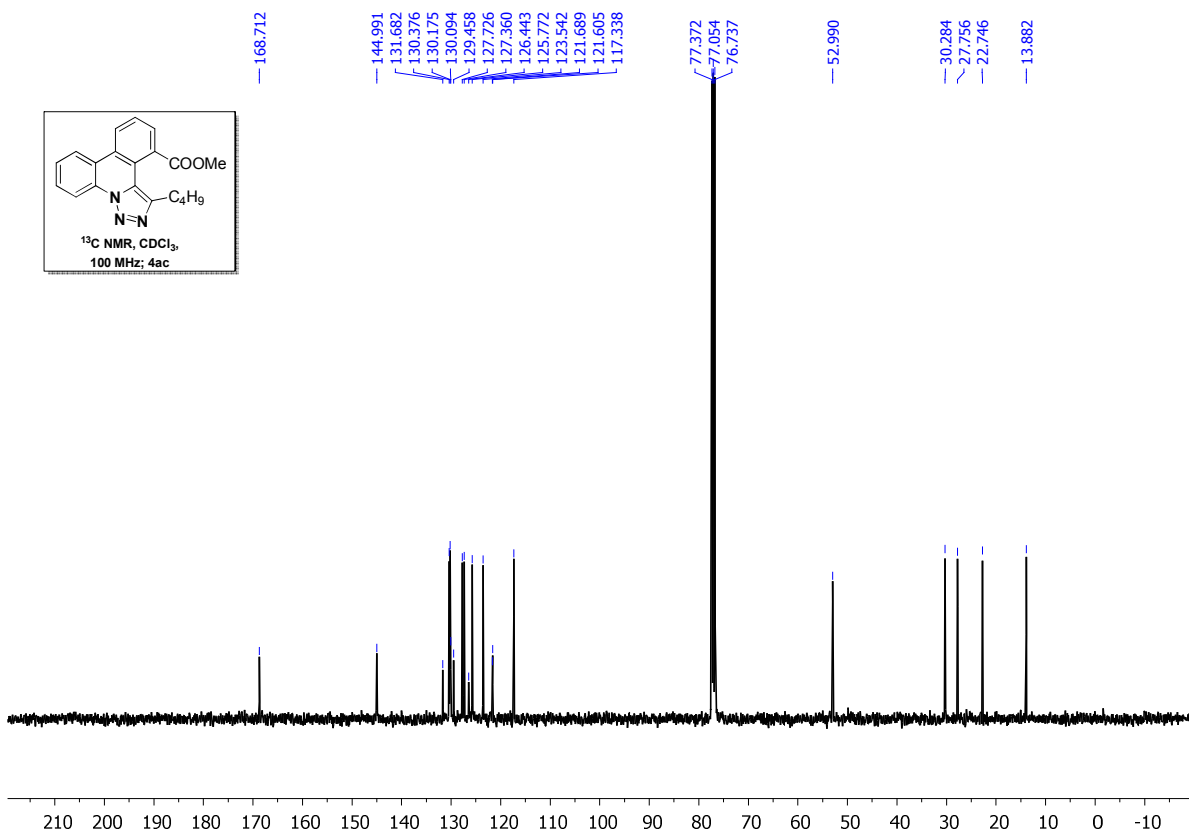

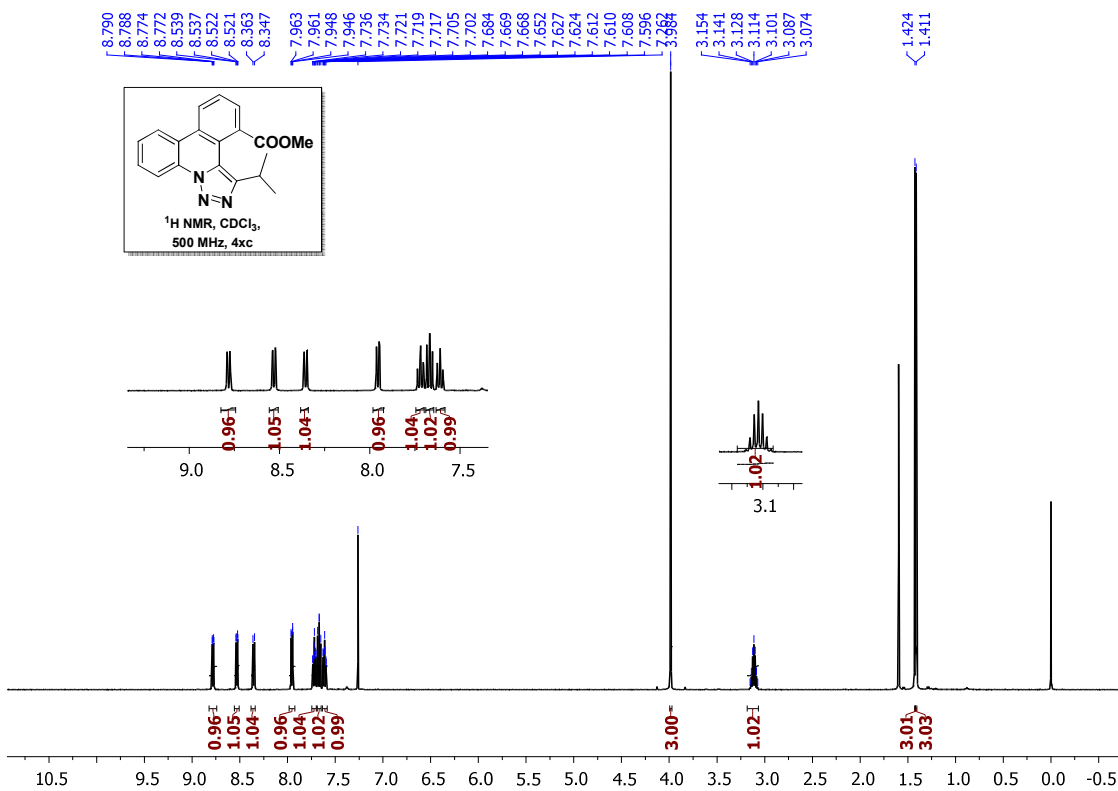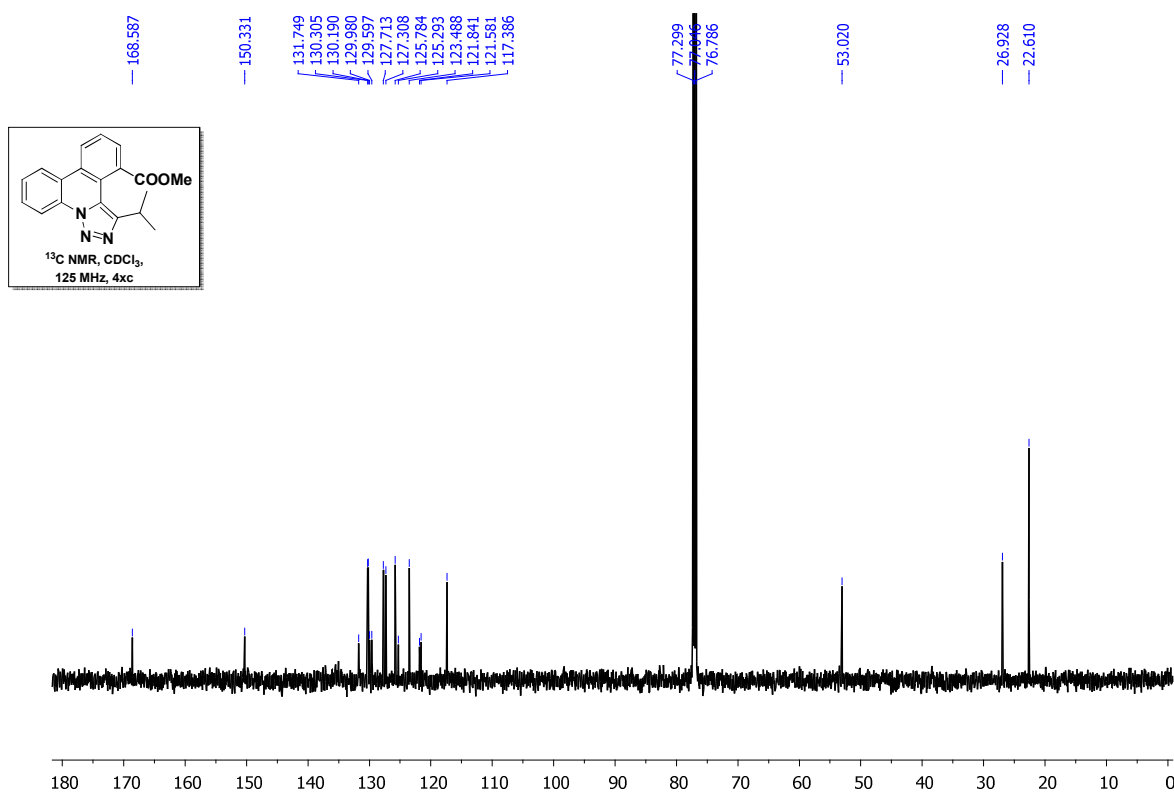

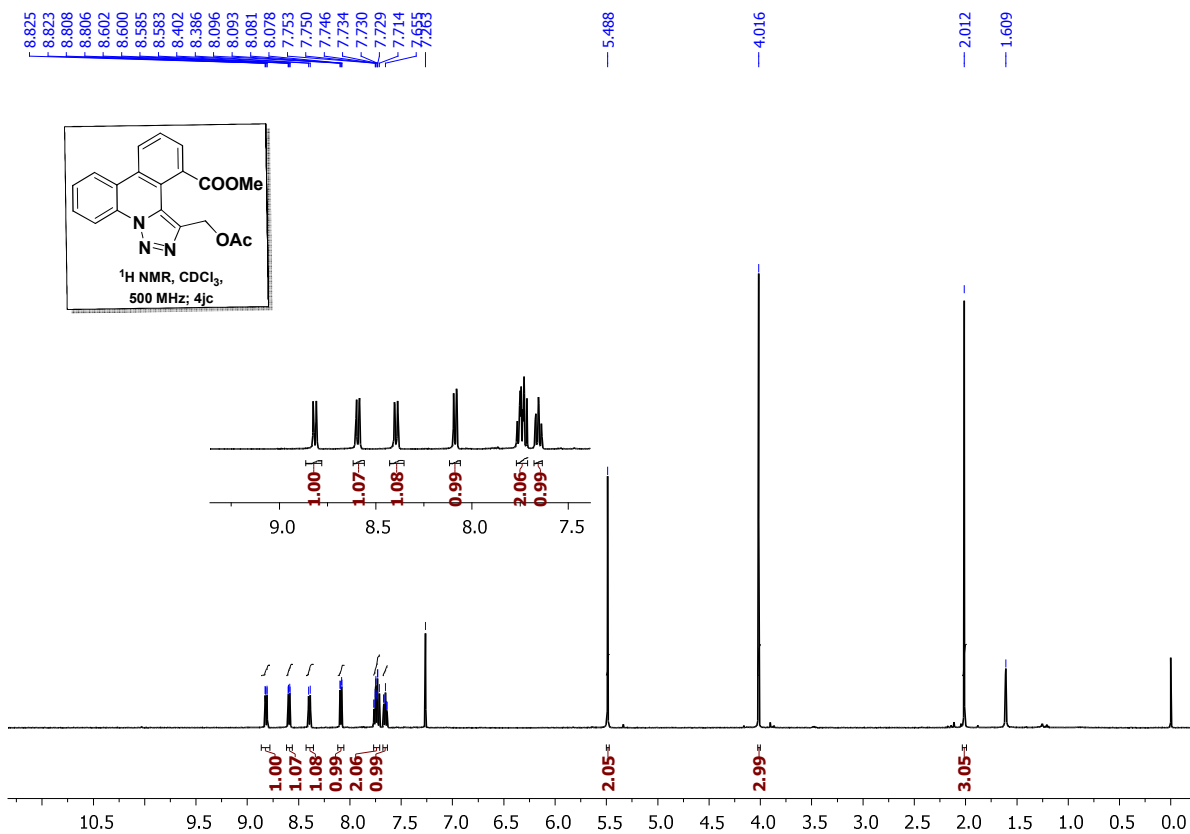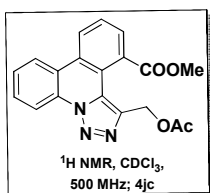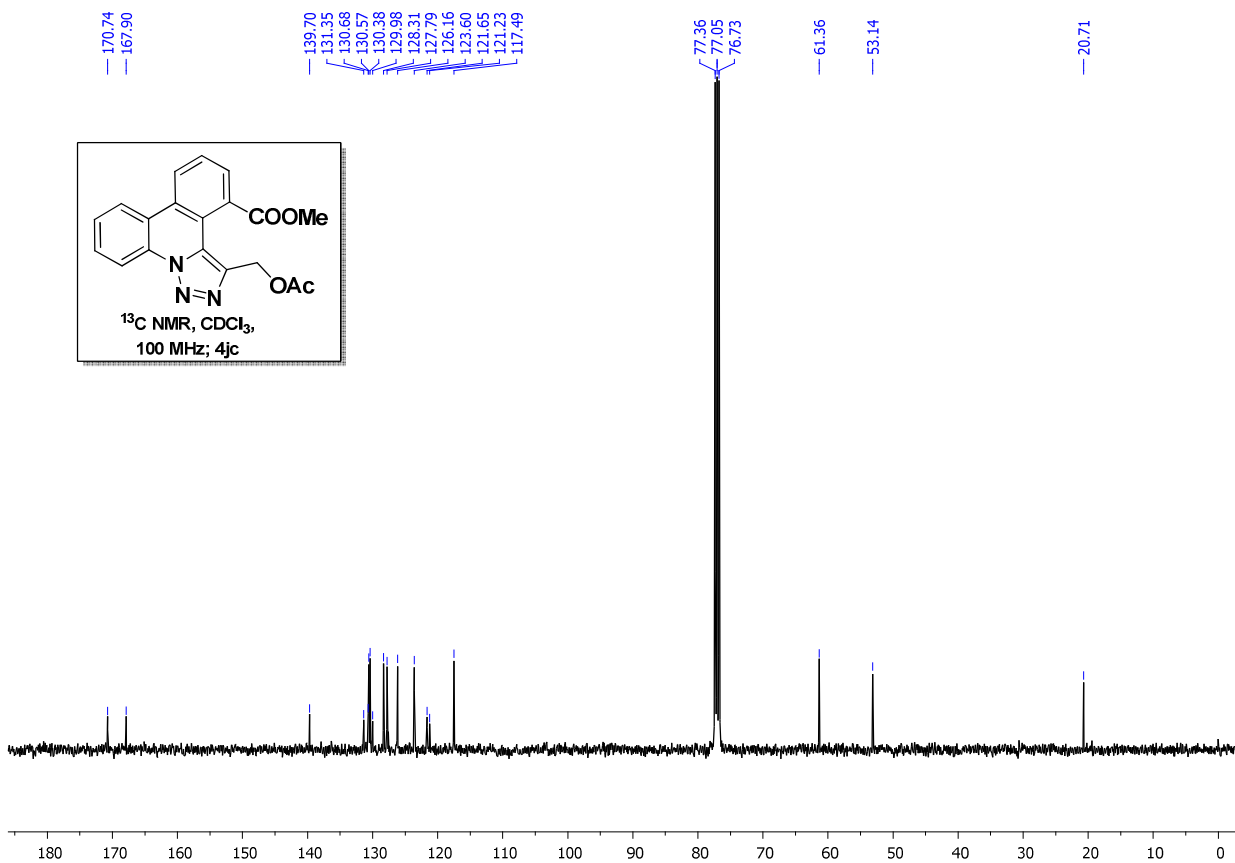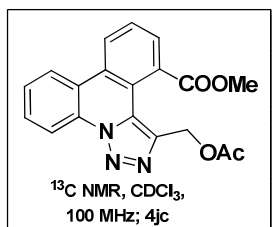

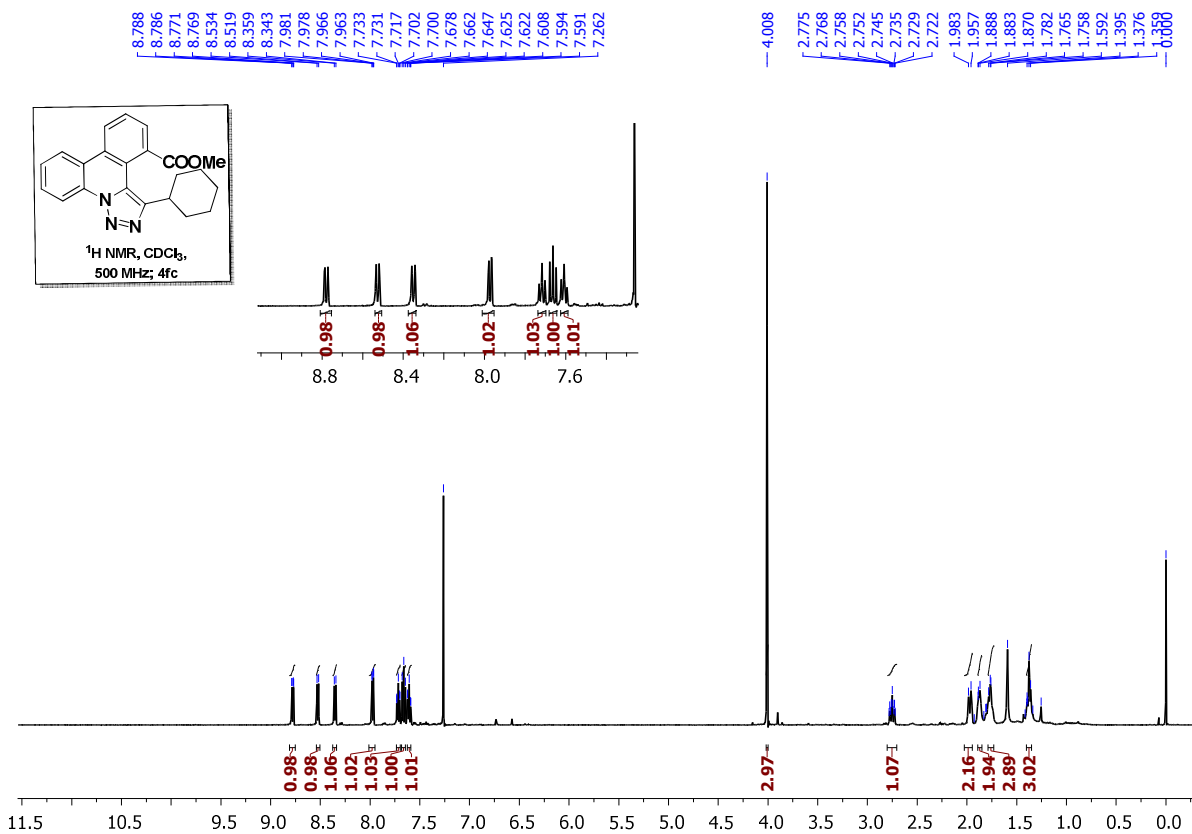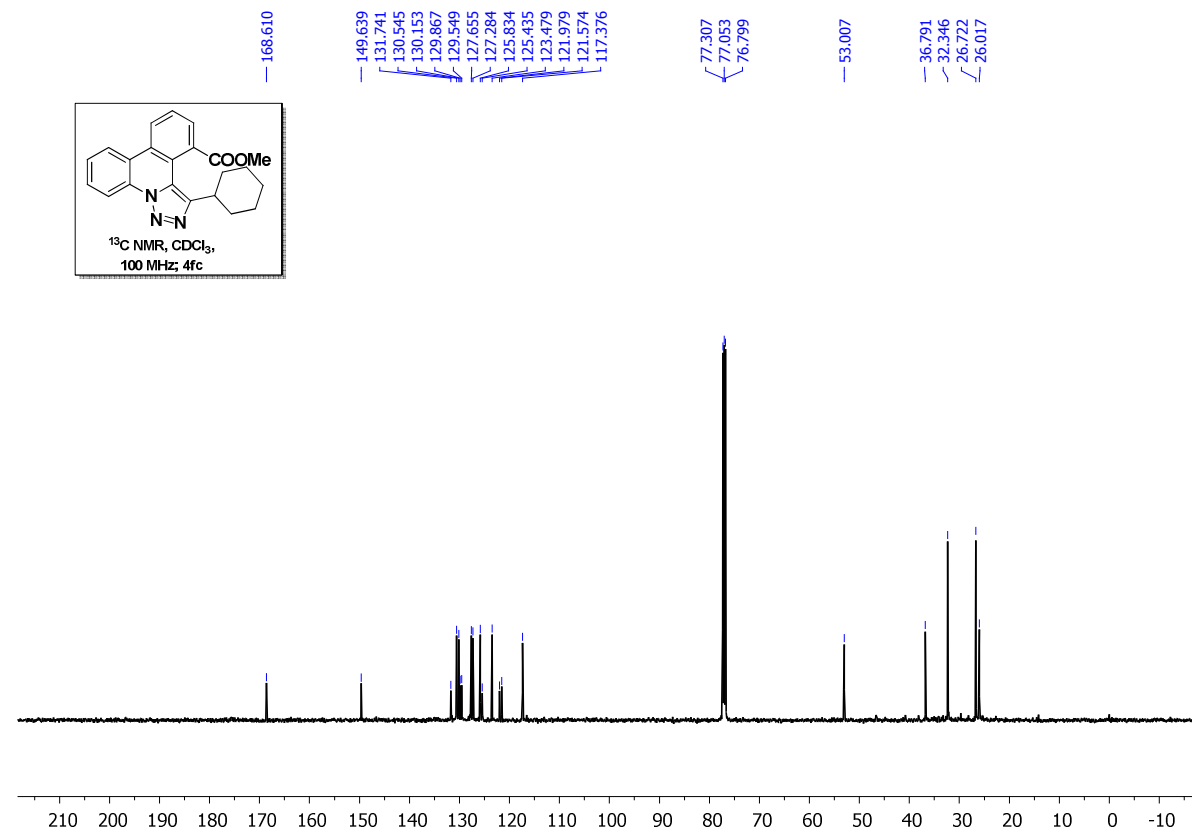

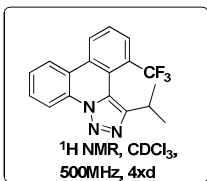

8.76, 8.75, 8.74, 8.74, 8.59, 8.57, 8.57, 8.31, 7.94, 7.93, 7.93, 7.77, 7.77, 7.76, 7.74, 7.74, 7.74, 7.72, 7.72, 7.71, 7.70, 7.63, 7.62, 7.61, 7.61, 7.61, 7.59, 7.59

3.61, 3.60, 3.59, 3.57, 3.56, 3.55, 3.53

1.41, 1.40

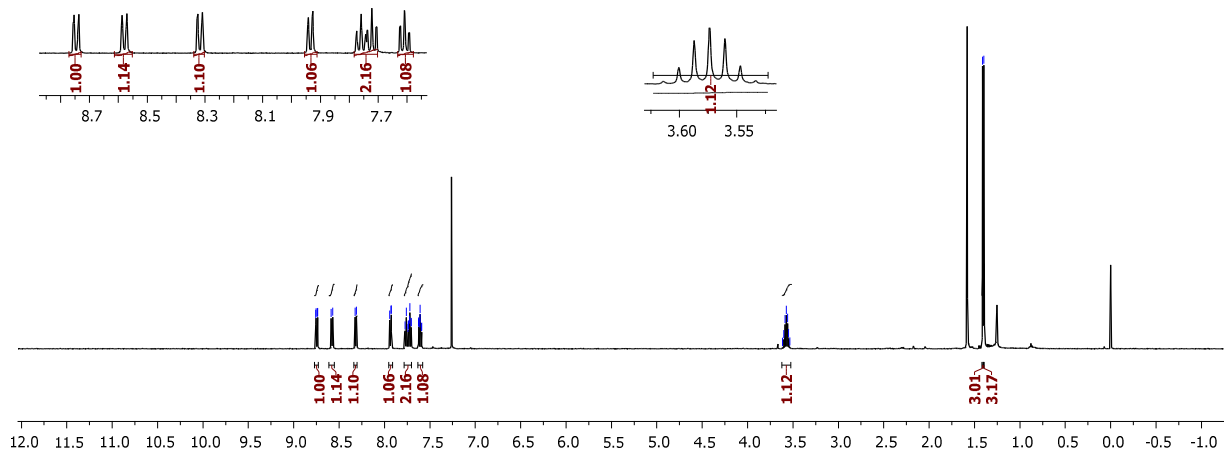

152.74, 131.68, 130.46, 128.96, 127.98, 127.47, 125.97, 123.56, 121.56, 117.50, 77.29, 76.78, 25.74, 23.07

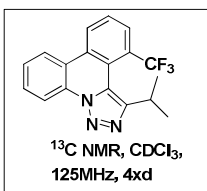

190, 180, 170, 160, 150, 140, 130, 120, 110, 100, 90, 80, 70, 60, 50, 40, 30, 20, 10, 0

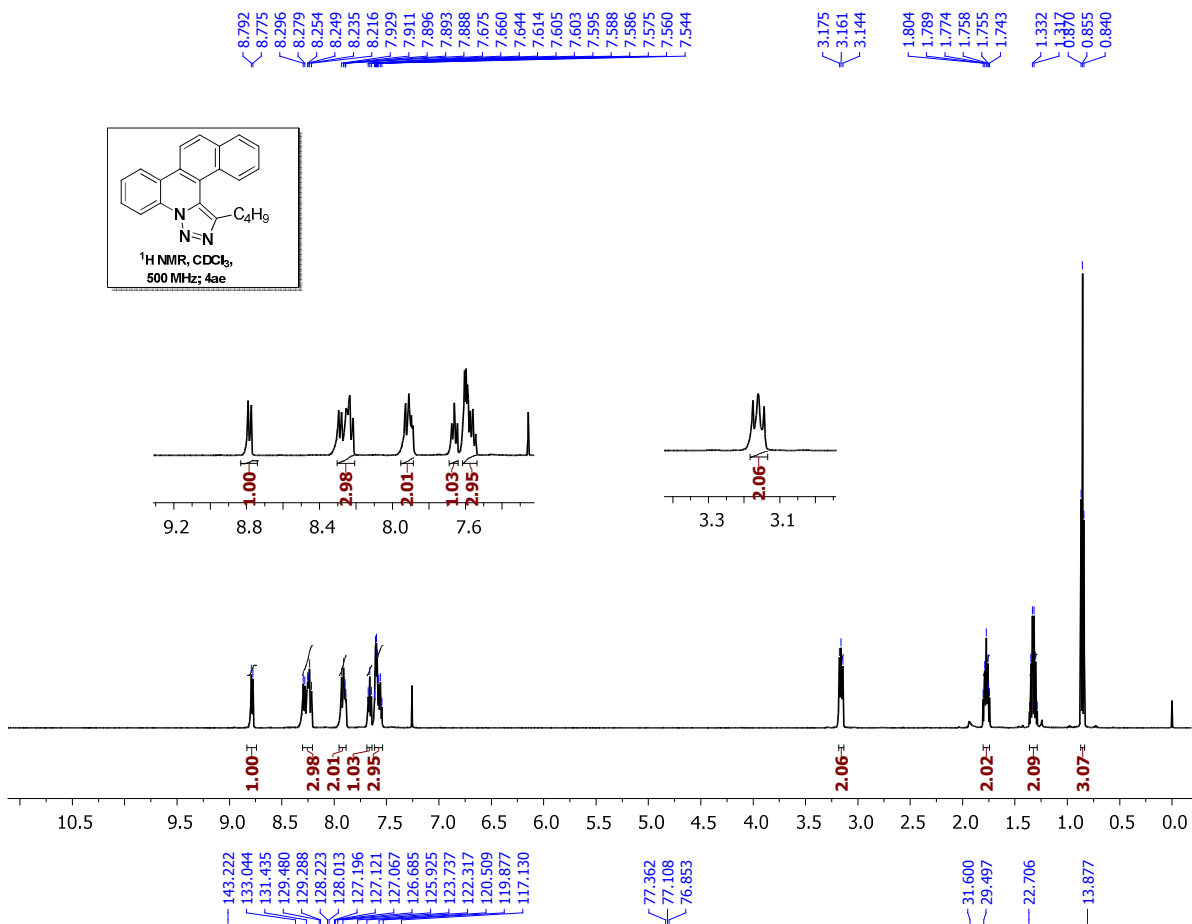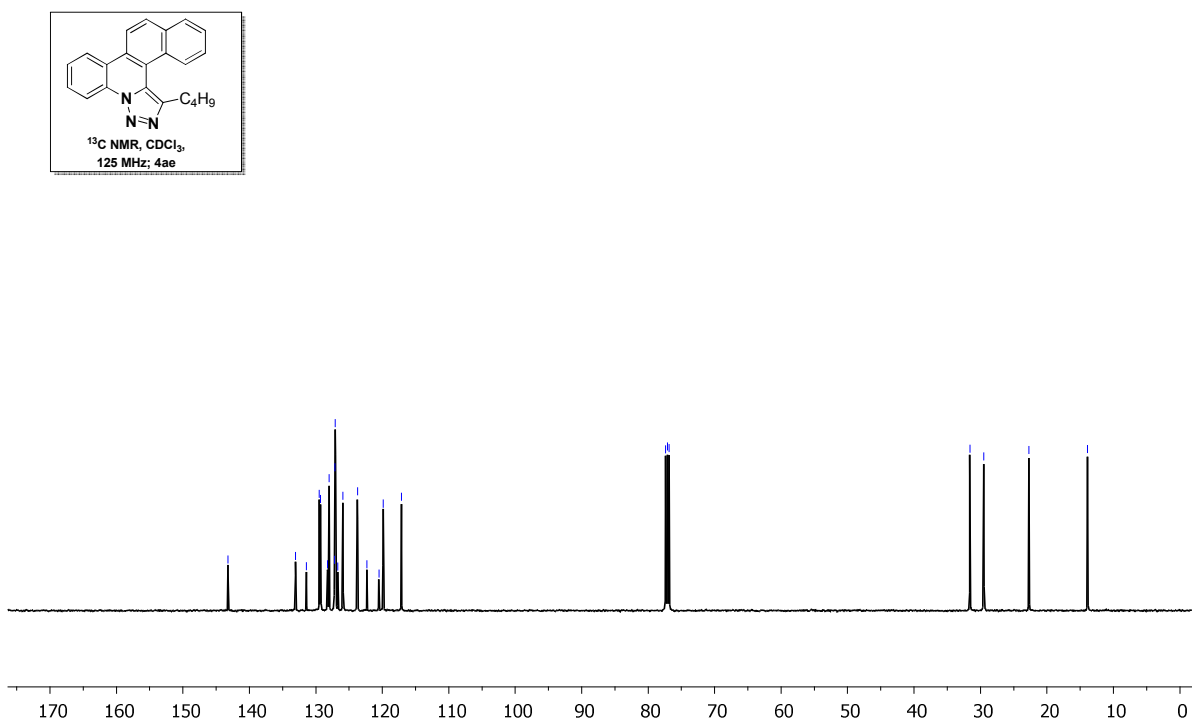

## X-Ray Crystallographic Study:

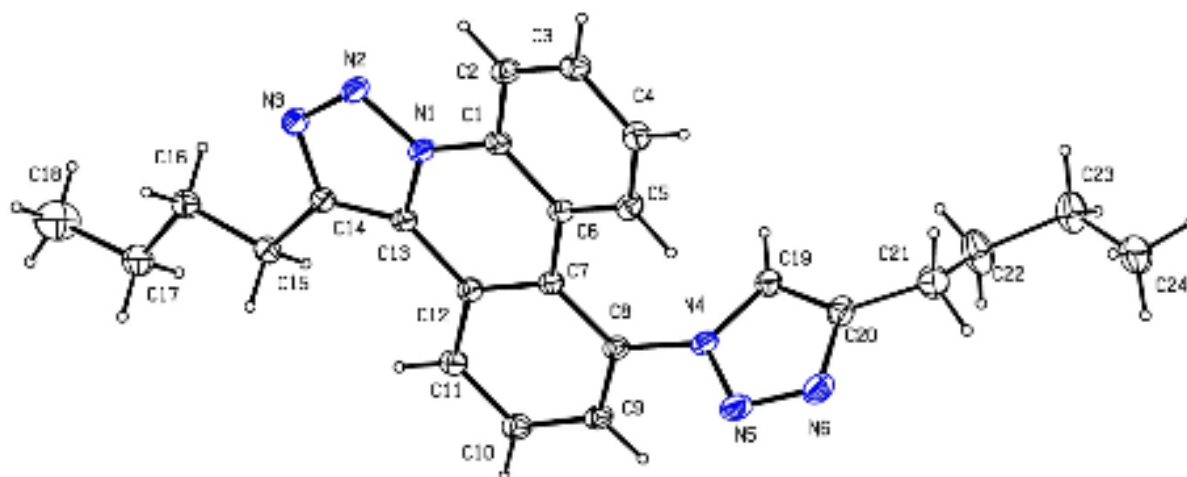

ORTEP structure of **2a**

X-ray data of **2a** compound was collected at room temperature using a Bruker Smart Apex CCD diffractometer with graphite monochromated MoK $\alpha$  radiation ( $\lambda=0.71073\text{\AA}$ ) with  $\omega$ -scan method.<sup>2</sup> Preliminary lattice parameters and orientation matrices were obtained from four sets of frames.

Integration and scaling of intensity data were accomplished using SAINT program.<sup>3</sup> The structures were solved by Direct Methods using SHELXS<sup>3</sup> and refinement was carried out by full-matrix least-squares technique using SHELXL.<sup>4</sup> The crystal was twinned, and the structure was refined using a HKLF5 file containing data for two twin domains, with a refined BASF of 0.31. Anisotropic displacement parameters were included for all non-hydrogen atoms. The atoms C21-C24 were disordered over two sites (C21/C22/C23/C24 and C211/C221/C231/C241). The site-occupancy factors of disordered atoms were refined to 0.790(9) and 0.210(9). DELU and DFIX constraints were applied to the disordered atoms. All H atoms were positioned geometrically and treated as riding on their parent C atoms [C-H = 0.93-0.97  $\text{\AA}$  and  $U_{\text{iso}}(\text{H}) = 1.5U_{\text{eq}}(\text{C})$  for methyl H or  $1.2U_{\text{eq}}(\text{C})$  for other H atoms]. The methyl groups were allowed to rotate but not to tip.

**Crystal Data for 2a:** C<sub>24</sub>H<sub>26</sub>N<sub>6</sub> ( $M=398.51$ ): triclinic, space group P-1 (no. 2),  $a = 7.619(2)\text{\AA}$ ,  $b = 9.692(3)\text{\AA}$ ,  $c = 15.884(5)\text{\AA}$ ,  $\alpha = 75.952(5)^\circ$ ,  $\beta = 79.091(5)^\circ$ ,  $\gamma = 71.433(5)^\circ$ ,  $V = 1070.6(6)\text{\AA}^3$ ,  $Z = 2$ ,  $T = 294(2)\text{ K}$ ,  $\mu(\text{MoK}\alpha) = 0.077\text{ mm}^{-1}$ ,  $D_{\text{calc}} = 1.236\text{ g/mm}^3$ , 9893 reflections measured ( $4.522 \leq 2\theta \leq$

50), 9893 unique which were used in all calculations. The final  $R_1$  was 0.0906 ( $I > 2\sigma(I)$ ) and  $wR_2$  was 0.2933 (all data). [CCDC 1408841](https://www.ccdc.cam.ac.uk/conts/retrieving.html) contains supplementary Crystallographic data for the structure. These data can be obtained free of charge at [www.ccdc.cam.ac.uk/conts/retrieving.html](http://www.ccdc.cam.ac.uk/conts/retrieving.html) [or from the Cambridge Crystallographic Data Centre (CCDC), 12 Union Road, Cambridge CB2 1EZ, UK; fax: +44(0) 1223 336 033; email: [deposit@ccdc.cam.ac.uk](mailto:deposit@ccdc.cam.ac.uk)].

## References

1. G. C Senadi, W-P Hu, S. S. K. Boomiathan and J-J Wang, *Adv. Synth. Catal.* **2013**, 355, 3679.
2. (a) M. Catellani, F. Frignani, A. Rangoni, *Angew. Chem. Int. Ed.* **1997**, 36, 119. (b) M. Catellani, M. C. Fagnola, *Angew. Chem. Int. Ed.* **1994**, 33, 2421. (c) “Novel Methods of Aromatic Functionalization Using Palladium and Norbornene as a Unique Catalytic System”, M. Catellani, *Top Organomet Chem*, **2005**, 14, 21-53.
3. SMART & SAINT. Software Reference manuals. Versions 6.28a & 5.625, Bruker Analytical X-ray Systems Inc., Madison, Wisconsin, U.S.A., 2001.
4. Sheldrick, G. M. SHELXS97 and SHELXL97, Programs for crystal structure solution and refinement; University of Gottingen: Germany, 1997.
